# Supplementary material
Source: publisher site journal article supplement (https://www.spandidos-publications.com/3123/downloadSupplementary)
Supplement: Supplementary file 1 [file downloadSupplementary]

## Sheet: Table S4
Table SIV. Associations between differentially expressed long non-coding RNAs and potential targets predicted according to a cis-acting pattern.
Chromosome	Start	End	Strands	LncRNA_id	Chromsome	Start	End	Strands	Gene_id	Gene_name
X	124922145	124922850	-	NONRATT031281.2	X	124921727	124926171	-	ENSRNOG00000002536	C1galt1c1
X	123528491	123535388	-	NONRATT031263.2	X	123528491	123600890	-	ENSRNOG00000043182	2020-09-06
X	113583122	113583744	-	NONRATT031177.2	X	113583843	113584459	-	ENSRNOG00000019176	Kcne5
X	107395601	107404754	-	NONRATT031164.2	X	107394485	107405564	-	ENSRNOG00000002389	Morf4l2
X	105804605	105805816	-	NONRATT031147.2	X	105805901	105835327	-	ENSRNOG00000024135	Zmat1
X	105351450	105359924	-	NONRATT031141.2	X	105352401	105355716	-	ENSRNOG00000011226	Timm8a1
X	75437270	75439574	-	NONRATT031085.2	X	75439777	75566481	-	ENSRNOG00000002751	Zdhhc15
X	74569337	74578471	-	NONRATT031078.2	X	74577130	74706214	-	ENSRNOG00000002832	Slc16a2
X	74371297	74371844	-	NONRATT031074.2	X	74371715	74372283	-	ENSRNOG00000018301	Rn60_X_0752.4
X	45518501	45520324	-	NONRATT030984.2	X	45519227	45522665	-	ENSRNOG00000026157	RGD1562200
X	29613535	29613928	-	NONRATT030946.2	X	29609376	29648359	-	ENSRNOG00000004613	Gpm6b
X	15949563	15950451	-	NONRATT030901.2	X	15948852	15950397	-	ENSRNOG00000028611	AABR07037203.1
X	14888400	14889626	-	NONRATT030878.2	X	14890827	14891124	+	ENSRNOG00000052581	mrt3
X	10771113	10771721	-	NONRATT030869.2	X	10771111	10772633	-	ENSRNOG00000023261	Ube2q2l
X	115351000	115352258	+	NONRATT030693.2	X	115351113	115351755	+	ENSRNOG00000034130	Hmg1l1
X	106713319	106714290	-	NONRATT030662.2	X	106713319	106715391	-	ENSRNOG00000028585	Tceal8
X	76042887	76046468	+	NONRATT030618.2	X	76042238	76046938	+	ENSRNOG00000002662	Pbdc1
X	71460661	71478324	+	NONRATT030588.2	X	71412288	71485085	+	ENSRNOG00000002565	Taf1
X	71155278	71155851	+	NONRATT030577.2	X	71155893	71160371	+	ENSRNOG00000033316	Foxo4
X	22399165	22399885	-	NONRATT030554.2	X	22408117	22413714	-	ENSRNOG00000061782	Tspyl2
X	40307897	40309047	+	NONRATT030524.2	X	40258492	40309278	+	ENSRNOG00000007644	Mbtps2
X	32304719	32308763	+	NONRATT030503.2	X	32304756	32328364	+	ENSRNOG00000033176	Zrsr2
X	29473225	29487999	+	NONRATT030498.2	X	29430830	29488737	+	ENSRNOG00000004275	Egfl6
X	17171569	17175134	+	NONRATT030463.2	X	17171604	17215100	+	ENSRNOG00000046053	Nudt10
9	103156721	103157130	-	NONRATT030326.2	9	103117505	103207190	-	ENSRNOG00000019128	LOC501189
9	98515259	98515712	-	NONRATT030282.2	9	98505258	98511160	+	ENSRNOG00000024688	Fam132b
9	91775864	91776569	-	NONRATT030233.2	9	91665985	91882927	-	ENSRNOG00000029735	Pid1
9	82328002	82331534	-	NONRATT030177.2	9	82338865	82345262	-	ENSRNOG00000018325	Cnppd1
9	79937557	79939422	-	NONRATT030144.2	9	79944154	79990219	+	ENSRNOG00000016503	Smarcal1
9	65406773	65408893	-	NONRATT030051.2	9	65406137	65442257	-	ENSRNOG00000025079	Fam126b
9	46286318	46298114	-	NONRATT029964.2	9	46286656	46309451	-	ENSRNOG00000013946	Rnf149
9	44085447	44126796	-	NONRATT029937.2	9	44033435	44126919	-	ENSRNOG00000018276	Mgat4a
9	15379380	15389897	-	NONRATT029793.2	9	15379384	15393131	-	ENSRNOG00000013852	Med20
9	100743292	100744051	+	NONRATT029691.2	9	100660393	100767940	+	ENSRNOG00000018051	Farp2
9	100436153	100438250	+	NONRATT029679.2	9	100440485	100445158	-	ENSRNOG00000037376	Mterfd2
9	98484400	98484933	+	NONRATT029667.2	9	98460176	98483419	+	ENSRNOG00000024717	Espnl	Espnl
9	97355924	97366428	+	NONRATT029655.2	9	97355923	97367445	+	ENSRNOG00000019622	Ackr3
9	93545476	93549442	+	NONRATT029618.2	9	93545395	93549436	+	ENSRNOG00000018584	Ptma
9	82633265	82635371	+	NONRATT029545.2	9	82632383	82639810	+	ENSRNOG00000019946	Gmppa
9	81954428	81954965	+	NONRATT029516.2	9	81940629	81954686	+	ENSRNOG00000017129	Ttll4
9	81373326	81374025	+	NONRATT029495.2	9	81194118	81400987	-	ENSRNOG00000014182	Tns1
9	51400305	51538063	+	NONRATT029357.2	9	51519294	51519401	-	ENSRNOG00000056424	U6
9	45680707	45681704	+	NONRATT029332.2	9	45672156	45680799	+	ENSRNOG00000013286	Pdcl3
9	42840386	42850183	+	NONRATT029310.2	9	42831741	42839837	-	ENSRNOG00000015366	Neurl3
9	41100447	41101108	+	NONRATT029307.2	9	41096834	41099189	+	ENSRNOG00000023603	Amer3	Amer3
9	37776620	37778934	+	NONRATT029290.2	9	37769958	37775154	-	ENSRNOG00000013285	Imp4
9	16771850	16835289	+	NONRATT029197.2	9	16815497	16820983	-	ENSRNOG00000046142	LOC100910371
9	16543719	16557359	+	NONRATT029185.2	9	16530073	16539472	+	ENSRNOG00000042581	Ptcra
9	14551772	14565532	+	NONRATT029150.2	9	14560503	14576967	+	ENSRNOG00000012702	Nfya
8	129239664	129240425	-	NONRATT029088.2	8	129205930	129232677	+	ENSRNOG00000018982	Entpd3
8	128610233	128616350	-	NONRATT029082.2	8	128610290	128622337	-	ENSRNOG00000018047	Gorasp1
8	122954546	122957477	-	NONRATT029060.2	8	122954947	122987191	-	ENSRNOG00000026455	Gpd1l
8	118187763	118192279	-	NONRATT029008.2	8	118160298	118182559	-	ENSRNOG00000029194	Dhx30
8	109482587	109484035	-	NONRATT028908.2	8	109455785	109478584	+	ENSRNOG00000023021	Msl2
8	104190377	104202265	-	NONRATT028882.2	8	104190031	104221342	-	ENSRNOG00000011501	Atp1b3
8	94863282	94874231	-	NONRATT028848.2	8	94801335	94857443	+	ENSRNOG00000010545	Mrap2
8	90630869	90631613	-	NONRATT028820.2	8	90628208	90664554	-	ENSRNOG00000031032	Hmgn3
8	90387337	90388899	-	NONRATT028816.2	8	90392142	90483077	-	ENSRNOG00000008652	Phip
8	87154562	87158029	-	NONRATT028808.2	8	87040798	87158368	-	ENSRNOG00000058470	Col12a1
8	84122113	84320749	-	NONRATT028794.2	8	84279228	84320746	-	ENSRNOG00000058120	Tinag
8	78909111	78949169	+	NONRATT028730.2	8	78872101	78949447	+	ENSRNOG00000055631	Zfp280d
8	79688668	79689647	+	NONRATT028716.2	8	79660656	79692039	+	ENSRNOG00000053428	Ccpg1
8	70192661	70203392	-	NONRATT028692.2	8	70192974	70215719	-	ENSRNOG00000011302	Rab11a
8	68569530	68570340	-	NONRATT028680.2	8	68526092	68563018	+	ENSRNOG00000008424	Aagab
8	59307817	59313557	-	NONRATT028587.2	8	59296345	59313521	-	ENSRNOG00000012803	Wdr61
8	58993769	59023387	-	NONRATT028583.2	8	58932579	59077690	-	ENSRNOG00000009170	Dmxl2
8	55176867	55178099	-	NONRATT028551.2	8	55176846	55177818	-	ENSRNOG00000010402	Hspb2
8	53837605	53839182	-	NONRATT028531.2	8	53839684	53901358	-	ENSRNOG00000031890	Ncam1
8	50164115	50166207	-	NONRATT028503.2	8	50139996	50162361	+	ENSRNOG00000016847	Bace1
8	39361214	39362399	-	NONRATT028416.2	8	39361457	39437270	-	ENSRNOG00000028856	Pknox2
8	22853699	22859779	-	NONRATT028339.2	8	22856538	22858565	+	ENSRNOG00000011490	LOC100361444
8	22326662	22336857	-	NONRATT028327.2	8	22319330	22336794	-	ENSRNOG00000043093	Ap1m2
8	21388266	21394781	-	NONRATT028294.2	8	21380503	21384131	-	ENSRNOG00000048394	Zfp560
8	13854961	13861182	-	NONRATT028273.2	8	13870769	13870891	+	ENSRNOG00000051521	SNORA32
8	12338380	12347385	-	NONRATT028259.2	8	12335431	12355091	-	ENSRNOG00000006792	Cep57
8	7211002	7212175	-	NONRATT028250.2	8	7213821	7426611	-	ENSRNOG00000026821	Arhgap42
8	122773639	122777462	+	NONRATT028120.2	8	122743188	122776806	+	ENSRNOG00000010434	Dync1li1
8	119524038	119524511	+	NONRATT028099.2	8	119486887	119523716	-	ENSRNOG00000033809	Mlh1
8	118262690	118278801	+	NONRATT028078.2	8	118206697	118325537	+	ENSRNOG00000020804	Smarcc1
8	117589568	117590867	+	NONRATT028049.2	8	117600748	117611922	+	ENSRNOG00000031816	Nckipsd
8	116285039	116285643	+	NONRATT028020.2	8	116295409	116297858	-	ENSRNOG00000021887	Cyb561d2
8	115609226	115609649	+	NONRATT028016.2	8	115618554	115621394	-	ENSRNOG00000014161	Rbm15b
8	81949651	81968999	+	NONRATT027876.2	8	81949876	81968589	+	ENSRNOG00000023086	Arpp19
8	70460041	70463243	+	NONRATT027796.2	8	70447039	70471137	+	ENSRNOG00000012469	Vwa9
8	65733159	65733509	+	NONRATT027769.2	8	65686647	65774940	+	ENSRNOG00000012868	Uaca
8	59499804	59503633	+	NONRATT027708.2	8	59420122	59501054	+	ENSRNOG00000013271	Ireb2
8	44991952	44992650	+	NONRATT027586.2	8	44991644	44991729	+	ENSRNOG00000054774	SNORD14
8	36711162	36712091	+	NONRATT027564.2	8	36714807	36720810	-	ENSRNOG00000055680	AC132671.1
8	33389736	33392240	+	NONRATT027551.2	8	33239138	33392305	+	ENSRNOG00000008709	Arhgap32
8	22453400	22454201	+	NONRATT027495.2	8	22446660	22454439	+	ENSRNOG00000007158	Qtrt1
8	13888632	13896085	+	NONRATT027450.2	8	13871212	13909188	-	ENSRNOG00000010999	Cep295
8	13868418	13871339	+	NONRATT027443.2	8	13877749	13877819	-	ENSRNOG00000055845	snoU2-30
8	13835429	13836875	+	NONRATT027436.2	8	13819562	13835168	-	ENSRNOG00000010496	Med17
8	12875112	12878749	+	NONRATT027428.2	8	12823154	12872705	+	ENSRNOG00000008173	Sesn3
8	12872778	12875701	+	NONRATT027425.2	8	12823154	12872705	+	ENSRNOG00000008173	Sesn3
8	12160542	12160862	+	NONRATT027415.2	8	11931766	12161722	+	ENSRNOG00000005879	Maml2
7	145147281	145149879	-	NONRATT027381.2	7	145146480	145154131	-	ENSRNOG00000036827	Ppp1r1a	Ppp1r1a
7	145147277	145149116	-	NONRATT027380.2	7	145146480	145154131	-	ENSRNOG00000036827	Ppp1r1a	Ppp1r1a
7	145147277	145148275	-	NONRATT027379.2	7	145146480	145154131	-	ENSRNOG00000036827	Ppp1r1a	Ppp1r1a
7	143939458	143950314	-	NONRATT027360.2	7	143958857	143966863	-	ENSRNOG00000014082	Sp7
7	142994118	142995026	-	NONRATT027338.2	7	142994118	143016040	-	ENSRNOG00000025994	Krt80
7	139293199	139294755	-	NONRATT027309.2	7	139281186	139318455	-	ENSRNOG00000055597	Hdac7
7	138706251	138707078	-	NONRATT027296.2	7	138704125	138707221	-	ENSRNOG00000007032	Amigo2
7	130068488	130069222	-	NONRATT027218.2	7	130058251	130069224	+	ENSRNOG00000029095	Trabd
7	124214474	124216485	-	NONRATT027180.2	7	124225703	124256077	-	ENSRNOG00000009756	Pacsin2
7	122915846	122923501	-	NONRATT027142.2	7	122922021	122926336	-	ENSRNOG00000024631	Chadl
7	117599625	117599997	-	NONRATT027061.2	7	117602040	117605141	-	ENSRNOG00000025497	Fbxl6
7	117566367	117567410	-	NONRATT027060.2	7	117538522	117565478	+	ENSRNOG00000021732	Hsf1
7	117299152	117299520	-	NONRATT027050.2	7	117230320	117289961	-	ENSRNOG00000023781	Plec
7	116789979	116810822	-	NONRATT027028.2	7	116787765	116872511	-	ENSRNOG00000007684	Zc3h3
7	116419578	116422169	-	NONRATT027021.2	7	116419577	116424570	-	ENSRNOG00000007137	Ly6i
7	107264234	107367929	-	NONRATT026982.2	7	107273418	107391184	-	ENSRNOG00000025460	Tmem71
7	104669169	104670024	-	NONRATT026921.2	7	104670075	104801045	-	ENSRNOG00000058733	Asap1
7	75413876	75419012	-	NONRATT026872.2	7	75409580	75421874	-	ENSRNOG00000008639	Pabpc1
7	59766841	59783263	-	NONRATT026759.2	7	59762501	59763219	-	ENSRNOG00000029115	RGD1564883
7	54767933	54778815	-	NONRATT026744.2	7	54756042	54767471	+	ENSRNOG00000004035	Krr1
7	52162716	52164687	-	NONRATT026733.2	7	52165232	52404774	-	ENSRNOG00000052157	Nav3
7	29959585	29961154	-	NONRATT026655.2	7	29959596	29986163	-	ENSRNOG00000025198	Gas2l3	Gas2l3
7	29021699	29046561	-	NONRATT026641.2	7	29029262	29044251	+	ENSRNOG00000005270	Sycp3
7	15231592	15242007	-	NONRATT026583.2	7	15242226	15249987	+	ENSRNOG00000004572	Zfp472
7	15158830	15172490	-	NONRATT026579.2	7	15159421	15163866	-	ENSRNOG00000030416	Zfp870
7	12561082	12561534	-	NONRATT026525.2	7	12561315	12569126	-	ENSRNOG00000012379	Wdr18
7	12414303	12415394	-	NONRATT026516.2	7	12401206	12405022	-	ENSRNOG00000015999	Cirbp
7	12400067	12403103	-	NONRATT026513.2	7	12398199	12399910	-	ENSRNOG00000016193	RGD1562114
7	11972667	11982179	-	NONRATT026492.2	7	11944957	11963268	-	ENSRNOG00000018529	Csnk1g2
7	11394889	11400807	-	NONRATT026456.2	7	11383115	11386948	+	ENSRNOG00000042897	Nmrk2
7	11394371	11400714	-	NONRATT026454.2	7	11383115	11386948	+	ENSRNOG00000042897	Nmrk2
7	9974309	10195137	-	NONRATT026416.2	7	9974624	9976367	-	ENSRNOG00000031216	Zfp347
7	3340298	3341920	-	NONRATT026406.2	7	3332787	3335579	+	ENSRNOG00000007650	Cd63
7	3098221	3099235	-	NONRATT026398.2	7	3098244	3102142	-	ENSRNOG00000005987	Suox
7	2824345	2825555	-	NONRATT026383.2	7	2827246	2851739	+	ENSRNOG00000023456	Rnf41
7	143059750	143069309	+	NONRATT026324.2	7	143059763	143075907	+	ENSRNOG00000008057	Krt7
7	142459169	142465000	+	NONRATT026305.2	7	142397370	142464043	+	ENSRNOG00000028879	Slc4a8
7	141973541	141974083	+	NONRATT026288.2	7	141973552	141981432	+	ENSRNOG00000001376	Mettl7a
7	125938020	125947152	+	NONRATT026185.2	7	125940322	125955873	+	ENSRNOG00000013764	Fam118a
7	125609985	125612291	+	NONRATT026181.2	7	125576326	125613114	+	ENSRNOG00000012475	Prr5
7	125607857	125609269	+	NONRATT026180.2	7	125576326	125613114	+	ENSRNOG00000012475	Prr5
7	122687526	122688791	+	NONRATT026138.2	7	122636170	122688819	+	ENSRNOG00000019196	Xpnpep3
7	121337110	121337713	+	NONRATT026123.2	7	121311032	121331587	+	ENSRNOG00000017108	Syngr1
7	120893990	120897681	+	NONRATT026117.2	7	120905336	120919261	-	ENSRNOG00000014440	Josd1
7	120372499	120375151	+	NONRATT026105.2	7	120373351	120380200	-	ENSRNOG00000011170	RGD1359634
7	120167188	120167847	+	NONRATT026101.2	7	120161090	120167020	+	ENSRNOG00000010209	Nol12
7	115825737	115827232	+	NONRATT026020.2	7	115766712	115826225	+	ENSRNOG00000029450	Adgrb1	Adgrb1
7	54233689	54237880	+	NONRATT025797.2	7	54247459	54249664	+	ENSRNOG00000004019	Phlda1
7	41402817	41404003	+	NONRATT025772.2	7	41304439	41404370	+	ENSRNOG00000024450	Poc1b
7	29479206	29480053	+	NONRATT025711.2	7	29435443	29477947	+	ENSRNOG00000006367	Slc5a8	Slc5a8
7	26989409	26995661	+	NONRATT025686.2	7	26946124	26984400	-	ENSRNOG00000009088	Txnrd1
7	12848482	12851105	+	NONRATT025596.2	7	12851738	12874215	-	ENSRNOG00000008831	Hcn2
7	12432889	12434863	+	NONRATT025575.2	7	12414732	12424367	-	ENSRNOG00000015434	Midn
7	11180518	11182339	+	NONRATT025512.2	7	11191130	11195866	-	ENSRNOG00000004259	Dohh
7	11179961	11180499	+	NONRATT025511.2	7	11181385	11182279	+	ENSRNOG00000053040	AC094643.2
7	2813612	2814654	+	NONRATT025462.2	7	2813874	2819299	-	ENSRNOG00000033361	Slc39a5
6	147089843	147138897	-	NONRATT025433.2	6	147094096	147172022	-	ENSRNOG00000006569	Itgb8
6	145785081	145785609	-	NONRATT025428.2	6	145777851	145777991	-	ENSRNOG00000056323	SNORA7
6	124929800	124934502	-	NONRATT025277.2	6	124905807	125027553	-	ENSRNOG00000004482	Ccdc88c
6	115320464	115324150	-	NONRATT025255.2	6	115320466	115352681	-	ENSRNOG00000004300	Gtf2a1
6	107467941	107468329	+	NONRATT025222.2	6	107423217	107461041	-	ENSRNOG00000038183	Heatr4
6	107531505	107536350	+	NONRATT025221.2	6	107531527	107536789	+	ENSRNOG00000053460	Acot3
6	105265785	105266107	-	NONRATT025168.2	6	105224165	105261549	-	ENSRNOG00000006399	Synj2bp
6	99658202	99659425	-	NONRATT025123.2	6	99625305	99655362	+	ENSRNOG00000006570	Plekhg3
6	96167213	96171613	-	NONRATT025109.2	6	96164578	96171629	-	ENSRNOG00000007785	Trmt5
6	75793222	75798319	-	NONRATT025014.2	6	75793959	75874235	-	ENSRNOG00000006828	Baz1a
6	43844931	43845521	-	NONRATT024964.2	6	43844936	43862131	-	ENSRNOG00000058891	Cys1
6	50598257	50598968	-	NONRATT024952.2	6	50597676	50618694	-	ENSRNOG00000006364	Dld
6	41827610	41839107	-	NONRATT024928.2	6	41799748	41870046	-	ENSRNOG00000004377	Lpin1
6	29139437	29145898	+	NONRATT024899.2	6	29012206	29163134	+	ENSRNOG00000058973	Atad2b
6	27565693	27582980	-	NONRATT024883.2	6	27555688	27582985	-	ENSRNOG00000010800	Hadhb
6	26763899	26764658	-	NONRATT024859.2	6	26762760	26771164	-	ENSRNOG00000025736	Tcf23
6	23456221	23473149	-	NONRATT024836.2	6	23448685	23448761	-	ENSRNOG00000060589	SNORD53_SNORD92
6	6696339	6709774	-	NONRATT024782.2	6	6695826	6709783	-	ENSRNOG00000004526	Cox7a2l
6	137071674	137072721	+	NONRATT024697.2	6	137063610	137071722	+	ENSRNOG00000013097	LOC691485
6	106578623	106579002	+	NONRATT024472.2	6	106497124	106598668	+	ENSRNOG00000008082	Rgs6
6	93543761	93548635	+	NONRATT024360.2	6	93549483	93562314	-	ENSRNOG00000008222	Timm9
6	76041578	76053744	+	NONRATT024289.2	6	76056498	76079283	-	ENSRNOG00000023591	Ppp2r3c
6	64224970	64284660	+	NONRATT024258.2	6	64252110	64284768	+	ENSRNOG00000039091	Pnpla8
6	49874876	49895502	+	NONRATT024191.2	6	49852129	49895510	+	ENSRNOG00000005522	Sh3yl1
6	49529932	49536676	+	NONRATT024188.2	6	49529227	49534958	+	ENSRNOG00000005144	Tmem18
6	43004475	43109314	+	NONRATT024167.2	6	43001947	43109071	+	ENSRNOG00000005492	Hpcal1
6	26074586	26082997	+	NONRATT024067.2	6	26051395	26128906	+	ENSRNOG00000004710	Rbks
6	22302120	22316897	+	NONRATT024046.2	6	22302068	22316894	+	ENSRNOG00000027126	Dpy30
6	10594144	10597064	+	NONRATT024020.2	6	10568613	10592454	-	ENSRNOG00000015325	Pigf
6	10305810	10306157	+	NONRATT024018.2	6	10306507	10385239	+	ENSRNOG00000021318	Epas1
6	2610693	2611108	+	NONRATT023983.2	6	2568989	2609370	+	ENSRNOG00000006523	Atl2
6	2262819	2280619	+	NONRATT023980.2	6	2216622	2280777	+	ENSRNOG00000006082	Rmdn2
5	172039876	172040854	-	NONRATT023928.2	5	172043517	172043928	-	ENSRNOG00000053592	AABR07050646.1
5	169491477	169491964	-	NONRATT023910.2	5	169486256	169499268	-	ENSRNOG00000033722	Rnf207
5	165736227	165737038	-	NONRATT023855.2	5	165724026	165774616	+	ENSRNOG00000013474	Casz1
5	165432094	165436319	-	NONRATT023852.2	5	165432094	165442048	-	ENSRNOG00000012455	Tardbp
5	159540758	159543736	-	NONRATT023778.2	5	159540452	159583049	-	ENSRNOG00000008334	Crocc
5	151828143	151832821	-	NONRATT023685.2	5	151823886	151824633	-	ENSRNOG00000033153	Sfn
5	151487570	151488696	-	NONRATT023682.2	5	151487576	151536518	-	ENSRNOG00000008377	Wdtc1
5	148490373	148491058	-	NONRATT023654.2	5	148470060	148492232	-	ENSRNOG00000012989	Serinc2
5	144250415	144252477	-	NONRATT023599.2	5	144250418	144274981	-	ENSRNOG00000010237	Map7d1
5	141415069	141417193	-	NONRATT023587.2	5	141390579	141405453	-	ENSRNOG00000026646	Ndufs5
5	135393994	135399670	-	NONRATT023491.2	5	135394015	135397591	-	ENSRNOG00000029152	Tmem69
5	129090227	129121351	-	NONRATT023470.2	5	129043674	129082442	+	ENSRNOG00000009519	Ttc39a
5	116996651	117038369	-	NONRATT023402.2	5	116996651	117038882	-	ENSRNOG00000007527	Tm2d1
5	113871314	113872682	-	NONRATT023388.2	5	113871229	113880911	-	ENSRNOG00000026323	Eqtn	Eqtn
5	105003830	105004441	-	NONRATT023367.2	5	104984413	105010857	-	ENSRNOG00000007060	Plin2	Plin2
5	92862228	92865113	-	NONRATT023334.2	5	92862266	93244202	-	ENSRNOG00000005711	Ptprd
5	88586011	88630251	-	NONRATT023327.2	5	88546606	88629491	-	ENSRNOG00000005882	Tle1
5	64214728	64219091	-	NONRATT023233.2	5	64179246	64225844	-	ENSRNOG00000008618	Tex10
5	50230941	50239621	-	NONRATT023133.2	5	50231860	50239419	-	ENSRNOG00000023035	Smim8
5	48501891	48547303	-	NONRATT023125.2	5	48501471	48504511	-	ENSRNOG00000007793	Pnrc1
5	173140299	173141564	+	NONRATT022927.2	5	173148883	173149276	+	ENSRNOG00000030447	LOC100364191
5	172504121	172547058	+	NONRATT022912.2	5	172488707	172547058	+	ENSRNOG00000014642	Morn1
5	169289956	169292669	+	NONRATT022886.2	5	169244777	169288309	+	ENSRNOG00000022694	Plekhg5
5	164857314	164858783	+	NONRATT022839.2	5	164845924	164860910	+	ENSRNOG00000008553	Mthfr
5	151413381	151417689	+	NONRATT022703.2	5	151413381	151417690	+	ENSRNOG00000009505	Cd164l2
5	150725718	150741414	+	NONRATT022693.2	5	150725673	150743730	+	ENSRNOG00000013255	Dnajc8
5	150080998	150082385	+	NONRATT022689.2	5	150084610	150167077	-	ENSRNOG00000010037	Epb4.1
5	150019695	150027049	+	NONRATT022683.2	5	150001280	150027049	+	ENSRNOG00000028047	Mecr
5	133420337	133420880	+	NONRATT022503.2	5	133221138	133420644	+	ENSRNOG00000029141	RGD1564942
5	127782204	127784092	+	NONRATT022470.2	5	127787448	127787505	-	ENSRNOG00000056182	7SK
5	126946898	126968109	+	NONRATT022456.2	5	126932759	126968190	+	ENSRNOG00000010512	Yipf1
5	122492048	122493302	+	NONRATT022437.2	5	122390521	122491203	+	ENSRNOG00000006357	Sgip1
5	117590366	117592209	+	NONRATT022409.2	5	117583501	117594870	+	ENSRNOG00000007890	Usp1
5	79077923	79078877	+	NONRATT022327.2	5	79055520	79170765	+	ENSRNOG00000007657	Col27a1
5	71822879	71824079	+	NONRATT022283.2	5	71742910	71823139	+	ENSRNOG00000032048	Zfp462
5	71800543	71822153	+	NONRATT022282.2	5	71742910	71823139	+	ENSRNOG00000032048	Zfp462
5	62747799	62750633	+	NONRATT022252.2	5	62718786	62750145	+	ENSRNOG00000008099	Galnt12
5	56566242	56566874	+	NONRATT022191.2	5	56567108	56576676	-	ENSRNOG00000024539	Ndufb6
5	8978017	8980011	+	NONRATT022043.2	5	8979348	8979433	+	ENSRNOG00000060290	SNORD87
5	5466543	5617326	+	NONRATT022029.2	5	5464322	5464444	+	ENSRNOG00000053278	SNORA40
4	176581894	176583751	-	NONRATT021950.2	4	176581896	176606382	-	ENSRNOG00000012602	Recql
4	170914379	170931969	-	NONRATT021928.2	4	170913922	170932618	-	ENSRNOG00000005809	Arhgdib
4	165424758	165460050	-	NONRATT021884.2	4	165424762	165456677	-	ENSRNOG00000031515	Klra2
4	157435370	157439790	-	NONRATT021848.2	4	157435372	157439507	-	ENSRNOG00000060098	Ptms
4	155947762	155957240	-	NONRATT021826.2	4	155947452	155959993	-	ENSRNOG00000042139	Clec4a1
4	150547348	150551047	-	NONRATT021770.2	4	150547466	150616895	-	ENSRNOG00000006717	Ankrd26
4	150467417	150471770	-	NONRATT021766.2	4	150443666	150471834	-	ENSRNOG00000006576	Bms1
4	146778555	146779157	-	NONRATT021717.2	4	146598412	146777124	+	ENSRNOG00000007486	Atg7
4	144634794	144636302	-	NONRATT021694.2	4	144638334	144869919	-	ENSRNOG00000006509	Srgap3
4	131415442	131464514	-	NONRATT021671.2	4	131366743	131694755	-	ENSRNOG00000009184	Foxp1
4	120750832	120751672	-	NONRATT021604.2	4	120671488	120771066	+	ENSRNOG00000014508	Mgll
4	117158714	117159690	-	NONRATT021562.2	4	117115075	117153907	-	ENSRNOG00000056009	Rab11fip5
4	116993297	116994278	-	NONRATT021556.2	4	116967999	116985551	+	ENSRNOG00000015493	Emx1
4	113559390	113565429	-	NONRATT021518.2	4	113559426	113610243	-	ENSRNOG00000006116	Hk2
4	100757691	100759507	-	NONRATT021505.2	4	100765312	100765435	-	ENSRNOG00000058052	SNORA36
4	100231317	100231774	-	NONRATT021496.2	4	100222105	100228809	-	ENSRNOG00000012035	Rnf181
4	99252263	99255198	-	NONRATT021480.2	4	99253632	99305812	-	ENSRNOG00000028422	Rmnd5a
4	99250835	99257480	-	NONRATT021479.2	4	99253632	99305812	-	ENSRNOG00000028422	Rmnd5a
4	88606837	88610720	-	NONRATT021452.2	4	88607517	88649216	-	ENSRNOG00000023969	Herc6
4	81235300	81236574	-	NONRATT021426.2	4	81237495	81241282	-	ENSRNOG00000011175	Hnrnpa2b1
4	78905427	78924188	-	NONRATT021402.2	4	78905379	78924181	-	ENSRNOG00000009156	Tra2a
4	77307190	77346917	-	NONRATT021390.2	4	77284403	77347011	-	ENSRNOG00000006048	Ezh2
4	66443481	66446814	-	NONRATT021350.2	4	66445265	66624912	-	ENSRNOG00000007034	Hipk2
4	48879767	48927622	-	NONRATT021258.2	4	48852826	48928372	-	ENSRNOG00000059016	Tspan12
4	34279318	34280129	-	NONRATT021235.2	4	34279319	34282351	-	ENSRNOG00000008309	Rpa3
4	29083110	29092706	-	NONRATT021216.2	4	29082364	29092753	-	ENSRNOG00000011008	Bet1
4	27776823	27778424	-	NONRATT021201.2	4	27785646	27966398	-	ENSRNOG00000009258	Cdk6
4	18173128	18173942	-	NONRATT021163.2	4	18178655	18396035	-	ENSRNOG00000023337	Sema3a
4	7261367	7262113	-	NONRATT021106.2	4	7257751	7260317	+	ENSRNOG00000013383	Tmub1
4	2114377	2201733	-	NONRATT021076.2	4	2116093	2201749	-	ENSRNOG00000059589	Lmbr1
4	179481387	179482402	+	NONRATT021035.2	4	179486104	179515558	-	ENSRNOG00000009338	Kras
4	157662539	157666340	+	NONRATT020912.2	4	157647081	157658390	+	ENSRNOG00000018453	Nop2
4	157651734	157652489	+	NONRATT020911.2	4	157612535	157645659	+	ENSRNOG00000018309	Chd4
4	157223276	157224222	+	NONRATT020890.2	4	157230894	157235051	+	ENSRNOG00000012999	Phb2
4	156779796	156782295	+	NONRATT020886.2	4	156752092	156785467	+	ENSRNOG00000010253	Cd163
4	153921941	153927715	+	NONRATT020875.2	4	153921114	153941391	+	ENSRNOG00000013547	Slc6a12
4	153081567	153082012	+	NONRATT020863.2	4	153047235	153078604	-	ENSRNOG00000011338	Cecr5
4	148782479	148784562	+	NONRATT020829.2	4	148782478	148784562	+	ENSRNOG00000023465	LOC500300
4	148230186	148256717	+	NONRATT020823.2	4	148208259	148268403	+	ENSRNOG00000011791	Zfand4
4	145440475	145446397	+	NONRATT020790.2	4	145440113	145449892	+	ENSRNOG00000009414	Creld1
4	124776114	124776972	-	NONRATT020730.2	4	124660261	124858250	-	ENSRNOG00000023257	Adamts9
4	123134866	123136668	-	NONRATT020718.2	4	123118467	123133609	+	ENSRNOG00000007519	Tmem43
4	118803632	118806796	+	NONRATT020679.2	4	118814283	118834955	+	ENSRNOG00000018410	Nfu1
4	118328978	118351326	+	NONRATT020666.2	4	118327532	118328602	-	ENSRNOG00000017708	AABR07073038.1
4	118243422	118249255	+	NONRATT020663.2	4	118243131	118271768	+	ENSRNOG00000017380	RGD1306746
4	114885718	114887317	+	NONRATT020616.2	4	114876832	114896573	+	ENSRNOG00000010048	Dctn1
4	113887102	113888359	+	NONRATT020601.2	4	113866803	113883477	+	ENSRNOG00000061373	Loxl3
4	112697960	112700152	+	NONRATT020594.2	4	112703040	112707270	-	ENSRNOG00000006968	Mrpl19
4	99937573	99989486	+	NONRATT020555.2	4	99964315	99964422	-	ENSRNOG00000057408	U6
4	97635410	97760118	+	NONRATT020530.2	4	97657670	97760102	+	ENSRNOG00000050231	Gng12
4	88441071	88513238	+	NONRATT020509.2	4	88441066	88515138	+	ENSRNOG00000006646	Vopp1
4	85009649	85083777	+	NONRATT020490.2	4	85009349	85090914	+	ENSRNOG00000049057	Znrf2
4	84854473	84863023	+	NONRATT020486.2	4	84854385	84871757	+	ENSRNOG00000010205	Mturn
4	62375014	62375321	+	NONRATT020358.2	4	62299043	62376533	+	ENSRNOG00000010397	Agbl3
4	57716021	57762723	+	NONRATT020323.2	4	57684677	57706613	-	ENSRNOG00000010154	Zc3hc1
4	44976870	44977875	+	NONRATT020266.2	4	44936289	44972267	+	ENSRNOG00000056207	Capza2
4	25525217	25527082	+	NONRATT020195.2	4	25507462	25527087	+	ENSRNOG00000006076	Steap2
4	2053761	2063860	+	NONRATT020099.2	4	2055614	2065818	+	ENSRNOG00000005691	Rnf32
4	594878	626742	+	NONRATT020090.2	4	594881	695383	+	ENSRNOG00000006718	Rbm33
3	177196686	177201486	-	NONRATT020068.2	3	177188043	177195894	+	ENSRNOG00000016288	Tcea2
3	168098509	168100149	-	NONRATT020014.2	3	168097484	168111920	-	ENSRNOG00000013062	Cyp24a1
3	154301534	154302253	+	NONRATT019893.2	3	154212201	154373169	+	ENSRNOG00000012021	Ctnnbl1
3	150062896	150063924	-	NONRATT019836.2	3	150055748	150056789	+	ENSRNOG00000036864	Actl10
3	123578532	123579206	-	NONRATT019697.2	3	123578996	123581518	-	ENSRNOG00000021241	Gfra4
3	123226973	123227795	-	NONRATT019691.2	3	123224241	123236535	-	ENSRNOG00000021234	Slc4a11
3	121310129	121310916	+	NONRATT019681.2	3	121317828	121317953	+	ENSRNOG00000060240	SNORA25
3	118109393	118111481	-	NONRATT019651.2	3	118109405	118137191	-	ENSRNOG00000008744	Cops2
3	83310875	83318476	-	NONRATT019496.2	3	83310883	83335960	-	ENSRNOG00000009689	Api5
3	82334734	82368287	-	NONRATT019486.2	3	82324353	82368357	-	ENSRNOG00000000047	Cd82
3	82324814	82331439	-	NONRATT019483.2	3	82324353	82368357	-	ENSRNOG00000000047	Cd82
3	72070385	72071866	-	NONRATT019429.2	3	72063503	72069534	+	ENSRNOG00000043106	Btbd18
3	66801110	66803169	-	NONRATT019414.2	3	66805394	66885085	-	ENSRNOG00000054212	Pde1a
X	112117196	112118254	+	NONRATT019330.2	X	112020645	112121943	+	ENSRNOG00000060542	Mid2
3	29993488	29996803	-	NONRATT019275.2	3	29862472	29984201	-	ENSRNOG00000004677	Zeb2
3	12020228	12021145	-	NONRATT019197.2	3	12020228	12029877	-	ENSRNOG00000022274	Slc2a8
3	12020226	12024616	-	NONRATT019196.2	3	12020228	12029877	-	ENSRNOG00000022274	Slc2a8
3	9873419	9892240	-	NONRATT019154.2	3	9865656	9936617	-	ENSRNOG00000008258	Fnbp1
3	9858714	9861656	-	NONRATT019151.2	3	9865656	9936617	-	ENSRNOG00000008258	Fnbp1
3	3453399	3462447	-	NONRATT019066.2	3	3453400	3476215	-	ENSRNOG00000017983	Ubac1
3	176824126	176825354	+	NONRATT018982.2	3	176821651	176856531	+	ENSRNOG00000027513	Rtel1
3	171037897	171049742	+	NONRATT018944.2	3	171015616	171030384	+	ENSRNOG00000021295	Rae1
3	163814944	163817911	+	NONRATT018895.2	3	163815549	163815641	+	ENSRNOG00000056200	SNORD12
3	161039970	161045320	+	NONRATT018874.2	3	161036702	161040511	-	ENSRNOG00000042526	Wfdc6a	Wfdc6a
3	152460445	152464394	-	NONRATT018825.2	3	152402519	152465228	+	ENSRNOG00000019992	Cnbd2
3	153208977	153210824	-	NONRATT018812.2	3	153197643	153207816	+	ENSRNOG00000006395	Tldc2
3	149161824	149168959	+	NONRATT018771.2	3	149131784	149208786	+	ENSRNOG00000010625	Dnmt3b
3	148709555	148712496	-	NONRATT018768.2	3	148709530	148722710	-	ENSRNOG00000010086	Plagl2
3	148234851	148237613	+	NONRATT018751.2	3	148234192	148245416	+	ENSRNOG00000007827	Cox4i2
3	124068774	124088668	+	NONRATT018629.2	3	124088156	124102240	+	ENSRNOG00000021255	Smox
3	123674966	123679820	+	NONRATT018612.2	3	123670274	123687691	+	ENSRNOG00000021244	Hspa12b
3	114355324	114639204	+	NONRATT018537.2	3	114355813	114378941	+	ENSRNOG00000028668	Slc28a2
3	105470970	105474339	+	NONRATT018453.2	3	105467479	105470475	-	ENSRNOG00000008337	Gjd2	Gjd2
3	105470969	105477512	+	NONRATT018452.2	3	105467479	105470475	-	ENSRNOG00000008337	Gjd2	Gjd2
3	97892213	97895556	+	NONRATT018433.2	3	97721667	97896422	+	ENSRNOG00000004863	Mpped2
3	63257649	63379292	+	NONRATT018282.2	3	63379030	63451037	+	ENSRNOG00000010812	Osbpl6
3	56057034	56059377	+	NONRATT018223.2	3	56056924	56069852	+	ENSRNOG00000007981	Klhl23
3	55989234	55991229	+	NONRATT018222.2	3	55996498	56030744	-	ENSRNOG00000052954	Ccdc173
3	55923335	55924823	+	NONRATT018218.2	3	55925598	55951584	-	ENSRNOG00000024335	Fastkd1
3	55904543	55907722	+	NONRATT018217.2	3	55886694	55907716	+	ENSRNOG00000007127	Bbs5
3	47475090	47492026	+	NONRATT018183.2	3	47439075	47515700	+	ENSRNOG00000008859	Tank
3	45962044	45963977	+	NONRATT018164.2	3	45925007	45955449	-	ENSRNOG00000005990	Wdsub1
3	38669629	38677637	+	NONRATT018140.2	3	38682145	38741113	-	ENSRNOG00000004864	Prpf40a
3	35230840	35257416	+	NONRATT018129.2	3	35014537	35239888	+	ENSRNOG00000004680	Kif5c
3	15198342	15199549	+	NONRATT018070.2	3	15084633	15278645	-	ENSRNOG00000019339	Ttll11
3	14363267	14364690	+	NONRATT018065.2	3	14304590	14370990	+	ENSRNOG00000022015	Cntrl
3	11047040	11070638	+	NONRATT018029.2	3	11056734	11056830	-	ENSRNOG00000053164	U6
3	8827396	8829505	+	NONRATT018005.2	3	8817075	8828136	+	ENSRNOG00000025296	Lrrc8a
3	8484881	8496001	+	NONRATT017977.2	3	8450611	8483703	+	ENSRNOG00000014584	Odf2
3	7729407	7731816	+	NONRATT017960.2	3	7686502	7730539	+	ENSRNOG00000013491	Setx
3	6539098	6581345	+	NONRATT017935.2	3	6430200	6571377	+	ENSRNOG00000008749	Col5a1
20	43099233	43107892	-	NONRATT017794.2	20	43084869	43108198	-	ENSRNOG00000000604	Hdac2
20	32223481	32223841	-	NONRATT017751.2	20	32213147	32232632	-	ENSRNOG00000043099	Ddx21
20	14180228	14188106	-	NONRATT017688.2	20	14167585	14193690	-	ENSRNOG00000038258	Upb1
20	10674149	10675694	-	NONRATT017650.2	20	10668410	10680283	-	ENSRNOG00000001189	Sik1
20	7476719	7478481	-	NONRATT017624.2	20	7431354	7471900	+	ENSRNOG00000000495	Uhrf1bp1
20	7151595	7152345	-	NONRATT017620.2	20	7140244	7142213	-	ENSRNOG00000054374	AC095263.1
20	4806944	4808550	-	NONRATT017555.2	20	4806107	4817146	-	ENSRNOG00000000841	Ddx39b
20	3242491	3246976	-	NONRATT017510.2	20	3242469	3249189	+	ENSRNOG00000000787	RT1-T24-2
20	50475091	50476777	+	NONRATT017469.2	20	50447138	50474678	+	ENSRNOG00000043199	Bves
20	32571773	32573590	+	NONRATT017403.2	20	32509597	32572250	+	ENSRNOG00000030109	Kpna5
20	21839392	21841227	+	NONRATT017345.2	20	21847195	21874792	+	ENSRNOG00000000635	Arid5b
20	13819698	13824926	+	NONRATT017305.2	20	13827152	13829622	+	ENSRNOG00000001239	Ddt
20	12364381	12364893	+	NONRATT017283.2	20	12365385	12365673	-	ENSRNOG00000057037	AABR07044596.1
20	11208782	11211914	+	NONRATT017262.2	20	11168297	11228625	+	ENSRNOG00000023210	Trappc10
20	10992583	10993392	+	NONRATT017257.2	20	10981997	10993280	+	ENSRNOG00000001203	Rrp1
20	8366421	8385170	+	NONRATT017226.2	20	8325040	8368764	+	ENSRNOG00000000532	Cmtr1
20	7746231	7747363	+	NONRATT017209.2	20	7718281	7746331	+	ENSRNOG00000000500	Scube3
20	7630715	7631070	+	NONRATT017207.2	20	7484549	7636497	+	ENSRNOG00000000498	Anks1a
20	5567750	5568138	+	NONRATT017153.2	20	5535433	5564657	+	ENSRNOG00000000483	Syngap1
20	5354223	5418017	+	NONRATT017137.2	20	5414447	5418015	+	ENSRNOG00000038999	RT1-A1
20	5050569	5051290	+	NONRATT017118.2	20	5054654	5056474	-	ENSRNOG00000026936	G6b	G6b
20	5048782	5050863	+	NONRATT017117.2	20	5039352	5039458	+	ENSRNOG00000058745	U6
20	4517268	4517951	+	NONRATT017101.2	20	4495464	4508214	-	ENSRNOG00000000443	C4a
20	4093099	4093555	+	NONRATT017073.2	20	4094737	4097078	+	ENSRNOG00000033215	RT1-Db1	RT1-Db1
2	260319633	260320731	-	NONRATT016976.2	2	260249565	260535721	+	ENSRNOG00000042332	Slc44a5
2	257544763	257546904	-	NONRATT016958.2	2	257493874	257546799	-	ENSRNOG00000056332	Fam73a
2	257453545	257484590	-	NONRATT016953.2	2	257462311	257462651	+	ENSRNOG00000058222	AABR07013802.1
2	252341199	252353506	-	NONRATT016935.2	2	252359975	252368473	+	ENSRNOG00000015936	Gng5
2	236477972	236480539	-	NONRATT016880.2	2	236458278	236480502	-	ENSRNOG00000011284	Sgms2
2	227718790	227719556	-	NONRATT016850.2	2	227719169	227719299	-	ENSRNOG00000053898	SNORA24
2	226652020	226660156	-	NONRATT016832.2	2	226563049	226679438	+	ENSRNOG00000013737	Bcar3
2	211762480	211764514	-	NONRATT016798.2	2	211740636	211753297	+	ENSRNOG00000042814	Henmt1
2	211706245	211714844	-	NONRATT016794.2	2	211706227	211715311	-	ENSRNOG00000020438	Prpf38b
2	210803868	210805276	-	NONRATT016768.2	2	210803868	210809306	-	ENSRNOG00000029726	Gstm1	Gstm1
2	210725052	210726221	-	NONRATT016760.2	2	210720719	210726179	-	ENSRNOG00000018937	Gstm7
2	189086866	189087667	-	NONRATT016602.2	2	189062442	189083236	+	ENSRNOG00000020744	Adar
2	187296983	187301977	-	NONRATT016544.2	2	187294108	187302691	-	ENSRNOG00000011645	Rrnad1
2	152785959	152788350	-	NONRATT016429.2	2	152785843	152824547	-	ENSRNOG00000014599	Dhx36
2	143892934	143906198	+	NONRATT016384.2	2	143892566	143925633	+	ENSRNOG00000059480	Supt20
2	122476730	122504523	-	NONRATT016334.2	2	122476172	122641409	-	ENSRNOG00000012734	Dcun1d1
2	118715224	118717190	-	NONRATT016307.2	2	118721333	118745766	-	ENSRNOG00000010119	Zmat3
2	115888131	115888526	-	NONRATT016292.2	2	115866700	115891097	-	ENSRNOG00000009899	Skil
2	88410568	88413958	-	NONRATT016226.2	2	88384795	88414012	-	ENSRNOG00000010891	Lrrcc1	Lrrcc1
2	88404185	88408022	-	NONRATT016225.2	2	88384795	88414012	-	ENSRNOG00000010891	Lrrcc1	Lrrcc1
2	88402887	88403723	-	NONRATT016224.2	2	88384795	88414012	-	ENSRNOG00000010891	Lrrcc1	Lrrcc1
2	60314021	60314560	+	NONRATT016191.2	2	60131775	60308152	+	ENSRNOG00000057557	Prlr
2	49128332	49138801	-	NONRATT016117.2	2	49087225	49128501	-	ENSRNOG00000010824	Parp8
2	20898482	20898797	+	NONRATT016005.2	2	20857201	20901659	+	ENSRNOG00000061414	Acot12	Acot12
2	26500018	26501747	-	NONRATT015996.2	2	26501832	26699333	-	ENSRNOG00000018094	Sv2c	Sv2c
2	20076346	20114079	-	NONRATT015960.2	2	19853545	20152884	-	ENSRNOG00000016342	Atg10
2	240626552	240654450	+	NONRATT015791.2	2	240627435	240655246	+	ENSRNOG00000013741	Ube2d3
2	236232548	236232967	+	NONRATT015771.2	2	236233238	236345056	+	ENSRNOG00000010121	Lef1
2	211359658	211369714	+	NONRATT015702.2	2	211359622	211370284	+	ENSRNOG00000020315	Taf13
2	207131159	207131906	+	NONRATT015663.2	2	207108551	207128554	+	ENSRNOG00000019996	Slc16a1	Slc16a1
2	205525186	205534214	+	NONRATT015639.2	2	205525203	205552991	+	ENSRNOG00000061058	Csde1
2	198423731	198424453	+	NONRATT015588.2	2	198417618	198418029	+	ENSRNOG00000060366	AABR07012583.4
2	189871606	189877777	+	NONRATT015490.2	2	189878167	189880743	-	ENSRNOG00000013356	Snapin
2	188562081	188565332	+	NONRATT015446.2	2	188557570	188559882	-	ENSRNOG00000055433	Trim46
2	187283488	187284670	+	NONRATT015398.2	2	187275119	187284281	+	ENSRNOG00000042261	Hdgf
2	185342206	185392347	+	NONRATT015383.2	2	185393440	185429630	+	ENSRNOG00000011752	Sh3d19
2	151314796	151320380	+	NONRATT015323.2	2	151314817	151320319	+	ENSRNOG00000014232	P2ry1
2	150729331	150756141	+	NONRATT015319.2	2	150756257	150867775	+	ENSRNOG00000014076	Mbnl1
2	144934176	144939391	+	NONRATT015297.2	2	144861444	144939389	+	ENSRNOG00000032922	Dclk1
2	140618690	140619083	+	NONRATT015277.2	2	140576187	140618405	-	ENSRNOG00000013045	Setd7
2	121153324	121193232	+	NONRATT015220.2	2	121165136	121167545	+	ENSRNOG00000012199	Sox2
2	84327504	84328998	+	NONRATT015126.2	2	84275883	84328998	+	ENSRNOG00000010747	Dap
2	54365491	54366579	+	NONRATT015052.2	2	54191537	54360780	+	ENSRNOG00000014550	Plcxd3
2	44836494	44837226	+	NONRATT015025.2	2	44787001	44837831	+	ENSRNOG00000010369	Dhx29
2	20431366	20679758	+	NONRATT014914.2	2	20431242	20702515	+	ENSRNOG00000016213	Ssbp2
2	11820908	11822791	+	NONRATT014889.2	2	11658567	11818308	+	ENSRNOG00000033134	Mef2c
2	11818406	11820584	+	NONRATT014888.2	2	11658567	11818308	+	ENSRNOG00000033134	Mef2c
19	57126110	57126805	-	NONRATT014819.2	19	57127053	57192095	-	ENSRNOG00000026791	Pgbd5
19	55703837	55862204	-	NONRATT014796.2	19	55703823	55737500	-	ENSRNOG00000027906	Ankrd11
19	43194138	43196408	-	NONRATT014712.2	19	43193263	43215281	-	ENSRNOG00000018404	Aars
19	37526413	37527172	-	NONRATT014629.2	19	37526418	37528011	-	ENSRNOG00000039001	Agrp
19	24705477	24731983	-	NONRATT014544.2	19	24705480	24732024	-	ENSRNOG00000021808	Tecr
19	22621344	22632069	-	NONRATT014530.2	19	22590880	22626653	-	ENSRNOG00000059579	Gpt2	Gpt2
19	19898569	19913541	-	NONRATT014517.2	19	19895838	19896224	+	ENSRNOG00000046982	AABR07043085.1
19	11384111	11386236	-	NONRATT014469.2	19	11386023	11421498	+	ENSRNOG00000019020	Bbs2
19	11301985	11303133	-	NONRATT014467.2	19	11307966	11308740	-	ENSRNOG00000043098	Mt2A
19	10592786	10596842	-	NONRATT014457.2	19	10583856	10596851	-	ENSRNOG00000016190	Coq9
19	55427133	55428550	+	NONRATT014364.2	19	55389461	55423150	-	ENSRNOG00000014461	Galns
19	42121037	42123062	+	NONRATT014270.2	19	42110326	42127542	+	ENSRNOG00000014619	Dhx38
19	39215354	39216578	+	NONRATT014240.2	19	39207159	39207261	-	ENSRNOG00000051781	U6
19	34055542	34056525	+	NONRATT014183.2	19	34041218	34057159	+	ENSRNOG00000012860	Tmem184c
19	32295507	32312372	+	NONRATT014176.2	19	32308235	32325927	+	ENSRNOG00000011618	Mmaa
19	25999901	26001320	+	NONRATT014144.2	19	26000496	26006970	-	ENSRNOG00000003307	Gcdh
19	11467914	11470644	+	NONRATT014041.2	19	11450759	11467644	+	ENSRNOG00000042983	Nudt21
19	561728	563498	+	NONRATT013989.2	19	561726	564930	+	ENSRNOG00000011901	Rrad
18	74461063	74462107	-	NONRATT013950.2	18	74463196	74485139	-	ENSRNOG00000016753	Slc14a1
18	56968114	56969908	-	NONRATT013853.2	18	56965261	56965699	+	ENSRNOG00000031591	AABR07032255.2
18	41355008	41355543	-	NONRATT013811.2	18	41333550	41389510	-	ENSRNOG00000004033	Sema6a
18	31328394	31329024	-	NONRATT013783.2	18	31328918	31343797	-	ENSRNOG00000060410	Pcdh1
18	27357776	27374587	-	NONRATT013730.2	18	27357412	27374603	-	ENSRNOG00000020118	Nme5
18	16450159	16453163	-	NONRATT013695.2	18	16453368	16497886	-	ENSRNOG00000016036	Rprd1a
18	70260458	70263199	+	NONRATT013568.2	18	70263358	70329907	+	ENSRNOG00000014585	Cfap53
18	60720043	60721673	+	NONRATT013518.2	18	60392375	60719720	+	ENSRNOG00000017610	Nedd4l
18	55838275	55839403	+	NONRATT013477.2	18	55828157	55838966	+	ENSRNOG00000019235	Rbm22
18	44642284	44644762	+	NONRATT013424.2	18	44468783	44642050	+	ENSRNOG00000024671	Dmxl1
18	29644636	29645140	+	NONRATT013372.2	18	29639871	29644652	+	ENSRNOG00000016016	Zmat2
18	29110211	29110741	+	NONRATT013349.2	18	29110241	29111156	+	ENSRNOG00000019062	Pura
18	28370906	28383133	+	NONRATT013328.2	18	28361282	28390696	+	ENSRNOG00000019875	Matr3
18	28355633	28356304	+	NONRATT013319.2	18	28361282	28390696	+	ENSRNOG00000019875	Matr3
17	69639276	69642741	-	NONRATT013083.2	17	69634889	69647765	+	ENSRNOG00000050040	Akr1c13
17	46020442	46022396	+	NONRATT013022.2	17	45872413	46115004	-	ENSRNOG00000054964	Aoah
17	57316814	57318193	-	NONRATT013011.2	17	57304932	57394985	-	ENSRNOG00000014834	Epc1
17	42583935	42586365	-	NONRATT012959.2	17	42586479	42639922	-	ENSRNOG00000003094	Cmah	Cmah
17	22279169	22279991	-	NONRATT012873.2	17	22278797	22311392	-	ENSRNOG00000014460	Hivep1
17	21325480	21353205	-	NONRATT012868.2	17	21339058	21353134	-	ENSRNOG00000043288	LOC690806
17	18333191	18333919	+	NONRATT012845.2	17	18151981	18335019	+	ENSRNOG00000001455	Kif13a
17	13555809	13559354	-	NONRATT012820.2	17	13555348	13586554	-	ENSRNOG00000013773	Secisbp2
17	9454120	9457662	-	NONRATT012772.2	17	9457718	9458288	-	ENSRNOG00000047934	RGD1566359
17	1708049	1711500	-	NONRATT012710.2	17	1709702	1797732	-	ENSRNOG00000018999	Cdc14b
17	1029241	1031079	-	NONRATT012705.2	17	1032239	1085885	-	ENSRNOG00000019354	Ptch1
17	85356088	85358090	+	NONRATT012664.2	17	85364482	85368208	+	ENSRNOG00000016585	Bmi1
17	76287746	76288470	+	NONRATT012613.2	17	76184927	76281660	-	ENSRNOG00000023593	Upf2
17	44744509	44744901	-	NONRATT012540.2	17	44744590	44744902	-	ENSRNOG00000058444	AABR07027811.6
17	57074539	57088632	+	NONRATT012520.2	17	57031765	57087910	+	ENSRNOG00000014900	Crem
17	49610565	49614330	+	NONRATT012492.2	17	49610547	49617065	+	ENSRNOG00000013438	LOC500028
17	44025455	44036942	+	NONRATT012486.2	17	44025266	44039284	+	ENSRNOG00000017318	Zfp322a
17	43673987	43674573	+	NONRATT012481.2	17	43661275	43669327	+	ENSRNOG00000016967	Hfe
17	43632392	43632703	+	NONRATT012479.2	17	43633674	43634085	+	ENSRNOG00000045646	LOC684762
17	27333929	27334434	+	NONRATT012398.2	17	27286795	27334379	-	ENSRNOG00000013928	Dsp
17	16381092	16381886	+	NONRATT012351.2	17	16333414	16380573	+	ENSRNOG00000026564	Ptpdc1
17	16270637	16274626	+	NONRATT012347.2	17	16204426	16274622	+	ENSRNOG00000016816	Phf2
17	9817794	9818728	+	NONRATT012282.2	17	9797906	9816139	+	ENSRNOG00000016161	Lman2
17	822759	823888	+	NONRATT012180.2	17	833508	955615	-	ENSRNOG00000016889	Fancc
16	73372006	73372659	-	NONRATT012080.2	16	73372006	73410777	-	ENSRNOG00000017783	Sfrp1
16	41222354	41234142	-	NONRATT011968.2	16	41222237	41234095	-	ENSRNOG00000000108	Aga
16	21023922	21027026	-	NONRATT011887.2	16	21023995	21029134	-	ENSRNOG00000020427	Mef2bnb
16	21022534	21027024	-	NONRATT011886.2	16	21023995	21029134	-	ENSRNOG00000020427	Mef2bnb
16	20863140	20868790	-	NONRATT011876.2	16	20863128	20873436	-	ENSRNOG00000020178	Cope
16	20061928	20062759	-	NONRATT011852.2	16	20056764	20097287	-	ENSRNOG00000018452	Unc13a
16	19917548	19918487	-	NONRATT011845.2	16	19906317	19918689	-	ENSRNOG00000017676	Plvap
16	9620009	9620782	-	NONRATT011799.2	16	9625176	9658484	-	ENSRNOG00000020155	Mapk8
16	10722234	10726611	-	NONRATT011783.2	16	10722105	10726707	-	ENSRNOG00000058006	Sncg
16	3867192	3868075	-	NONRATT011720.2	16	3867207	3912148	-	ENSRNOG00000010984	Anxa11
16	81782490	81783052	+	NONRATT011666.2	16	81757581	81783047	+	ENSRNOG00000025222	Pcid2
16	71241390	71245612	+	NONRATT011596.2	16	71242469	71261591	+	ENSRNOG00000026180	Letm2
16	19973654	19974587	+	NONRATT011384.2	16	19973635	19978478	+	ENSRNOG00000017949	Mvb12a
16	19573871	19574625	+	NONRATT011361.2	16	19581811	19583386	-	ENSRNOG00000060701	Zfp617
16	18706166	18709135	+	NONRATT011342.2	16	18716018	18719403	+	ENSRNOG00000011438	Sftpa1
16	11028707	11029265	+	NONRATT011318.2	16	11032530	11106589	+	ENSRNOG00000052513	Wapal
16	10636950	10637570	+	NONRATT011314.2	16	10631043	10631170	-	ENSRNOG00000052277	SNORA15
16	4489559	4490270	+	NONRATT011260.2	16	4469467	4489860	+	ENSRNOG00000015618	Wnt5a
16	1950294	1954629	+	NONRATT011233.2	16	1953130	1953475	+	ENSRNOG00000052713	AABR07024498.1
15	109338762	109339329	-	NONRATT011218.2	15	109339563	109394905	-	ENSRNOG00000014310	Tmtc4
15	89261941	89278164	-	NONRATT011166.2	15	89268279	89339323	-	ENSRNOG00000009836	Rbm26
15	81576669	81577267	-	NONRATT011136.2	15	81576887	81577379	-	ENSRNOG00000022492	RGD1559682
15	52308510	52319189	-	NONRATT011067.2	15	52326777	52332097	-	ENSRNOG00000012912	Fgf17
15	52307916	52325990	-	NONRATT011066.2	15	52326777	52332097	-	ENSRNOG00000012912	Fgf17
15	38109631	38137880	-	NONRATT010946.2	15	38104422	38104570	-	ENSRNOG00000061336	U1
15	30541403	30544743	-	NONRATT010844.2	15	30550201	30550643	+	ENSRNOG00000054569	AABR07017745.3
15	19617847	19620318	-	NONRATT010790.2	15	19547870	19614805	+	ENSRNOG00000026328	Gpr137c
15	10434096	10451009	-	NONRATT010750.2	15	10405163	10455956	-	ENSRNOG00000006143	Ngly1
15	103160928	103174721	+	NONRATT010673.2	15	102164750	103170847	+	ENSRNOG00000046660	Gpc6
15	57391931	57392217	+	NONRATT010594.2	15	57340578	57405287	+	ENSRNOG00000011237	Zc3h13
15	52454334	52456411	+	NONRATT010578.2	15	52451160	52456409	+	ENSRNOG00000013922	Dok2
15	51804869	51809729	+	NONRATT010570.2	15	51798776	51817993	+	ENSRNOG00000018023	Bin3
15	51779895	51817932	+	NONRATT010568.2	15	51798776	51817993	+	ENSRNOG00000018023	Bin3
15	41080519	41080965	+	NONRATT010504.2	15	41069506	41081159	+	ENSRNOG00000013793	C1qtnf9
15	37156408	37171290	+	NONRATT010468.2	15	37171051	37227301	+	ENSRNOG00000008734	Zmym2
15	34156885	34164603	+	NONRATT010429.2	15	34155503	34167072	+	ENSRNOG00000018239	Dhrs4
15	24544018	24552726	+	NONRATT010343.2	15	24479760	24553197	+	ENSRNOG00000012255	Ktn1
15	4255185	4270395	+	NONRATT010252.2	15	4240202	4252072	+	ENSRNOG00000007632	Mss51
14	115314247	115337037	-	NONRATT010218.2	14	115314889	115352562	-	ENSRNOG00000007283	Erlec1
14	114525972	114528157	-	NONRATT010212.2	14	114518815	114692764	-	ENSRNOG00000005434	Sptbn1
14	108321358	108337859	-	NONRATT010176.2	14	108326624	108372157	-	ENSRNOG00000054669	0610010F05Rik
14	104502714	104503739	-	NONRATT010164.2	14	104475081	104500173	+	ENSRNOG00000004992	Rab1a
14	100420766	100425367	+	NONRATT010154.2	14	100420483	100422597	+	ENSRNOG00000005982	C1d
14	82337302	82339769	-	NONRATT010060.2	14	82336323	82347679	-	ENSRNOG00000017259	Tacc3
14	81660517	81679382	-	NONRATT010042.2	14	81687020	81725181	-	ENSRNOG00000058434	AABR07015859.1
14	69896525	69899441	-	NONRATT009960.2	14	69899127	69927938	-	ENSRNOG00000038572	Ncapg	Ncapg
14	44028029	44030913	-	NONRATT009893.2	14	44038613	44078897	-	ENSRNOG00000027152	N4bp2
14	42476229	42491422	-	NONRATT009875.2	14	42465806	42520020	-	ENSRNOG00000002246	Slc30a9
14	21103400	21128251	-	NONRATT009803.2	14	21070609	21127868	-	ENSRNOG00000003428	Rufy3
14	16372869	16377736	-	NONRATT009776.2	14	16341535	16364326	+	ENSRNOG00000002125	Ccni
14	2041828	2044534	-	NONRATT009672.2	14	2042410	2056762	-	ENSRNOG00000000043	Idua
14	115352795	115429670	+	NONRATT009666.2	14	115396016	115446142	+	ENSRNOG00000032471	Asb3
14	115262156	115267722	+	NONRATT009663.2	14	115275893	115278503	+	ENSRNOG00000022176	Gpr75
14	115223973	115229061	+	NONRATT009662.2	14	115166415	115269056	+	ENSRNOG00000060340	Psme4
14	78961269	78964106	+	NONRATT009556.2	14	78973363	78975166	+	ENSRNOG00000055319	Mrfap1
14	84892096	84901776	+	NONRATT009531.2	14	84876780	84913617	+	ENSRNOG00000007349	Ascc2
14	82376003	82405684	+	NONRATT009496.2	14	82356915	82366368	+	ENSRNOG00000037162	Slbp
14	63096784	63120478	+	NONRATT009400.2	14	63095719	63187009	+	ENSRNOG00000004473	Ppargc1a
14	36750783	36755360	+	NONRATT009320.2	14	36689095	36752141	+	ENSRNOG00000002106	Usp46
14	8438409	8438832	+	NONRATT009210.2	14	8383399	8548130	-	ENSRNOG00000056944	Arhgap24
14	8316255	8368255	+	NONRATT009207.2	14	8080273	8368253	+	ENSRNOG00000002079	Mapk10
13	110219278	110220123	-	NONRATT009130.2	13	110220282	110257367	-	ENSRNOG00000004195	Dtl	Dtl
13	98647380	98647745	-	NONRATT009047.2	13	98615286	98708149	+	ENSRNOG00000002969	Itpkb
13	89652515	89654112	-	NONRATT008963.2	13	89650093	89654244	-	ENSRNOG00000003567	Ppox
13	84083800	84087520	-	NONRATT008914.2	13	84083631	84217366	-	ENSRNOG00000003581	Pou2f1
13	74280171	74282320	-	NONRATT008852.2	13	74252404	74276964	-	ENSRNOG00000004307	Tor3a
13	69355918	69474965	-	NONRATT008807.2	13	69265648	69385074	-	ENSRNOG00000028236	RGD1309104
13	52260455	52261703	-	NONRATT008750.2	13	52265944	52266100	-	ENSRNOG00000061301	AC096239.4
13	52084030	52085430	-	NONRATT008739.2	13	52083858	52088780	-	ENSRNOG00000006330	Elf3
13	49159787	49160586	-	NONRATT008688.2	13	49132666	49169918	-	ENSRNOG00000000033	Tmcc2
13	47136052	47152970	-	NONRATT008674.2	13	47126740	47154292	-	ENSRNOG00000003927	Cd55
13	110681155	110684204	+	NONRATT008581.2	13	110677809	110681683	+	ENSRNOG00000004749	Slc30a1
13	83986789	83988591	+	NONRATT008422.2	13	83972211	83984675	+	ENSRNOG00000003291	Creg1
13	79204474	79205290	+	NONRATT008391.2	13	79203468	79204594	+	ENSRNOG00000026917	Rn60_13_0841.1
13	78853131	78855841	+	NONRATT008375.2	13	78854342	78854408	+	ENSRNOG00000055990	SNORD78
13	69901245	69902916	+	NONRATT008312.2	13	69909873	70174565	-	ENSRNOG00000002347	Rgl1
13	60529819	60536590	+	NONRATT008285.2	13	60529931	60537916	+	ENSRNOG00000003385	Glrx2
13	56601289	56604335	+	NONRATT008278.2	13	56546020	56591793	+	ENSRNOG00000012318	Aspm
13	52667339	52680873	+	NONRATT008253.2	13	52667968	52680794	+	ENSRNOG00000033734	Tnnt2
13	52187708	52188403	+	NONRATT008239.2	13	52193988	52197205	-	ENSRNOG00000007369	Shisa4
13	48812844	48813263	+	NONRATT008198.2	13	48790508	48813260	+	ENSRNOG00000007887	Elk4
13	48426864	48427544	+	NONRATT008192.2	13	48427037	48449490	+	ENSRNOG00000006963	Ctse
13	44974929	44986951	+	NONRATT008180.2	13	44957013	44990535	+	ENSRNOG00000003625	Ubxn4
12	52563675	52564351	-	NONRATT008115.2	12	52512969	52558606	-	ENSRNOG00000037437	Golga3
12	40809835	40810471	-	NONRATT008009.2	12	40713840	40822159	-	ENSRNOG00000001352	Hectd4
12	40225315	40226397	-	NONRATT007998.2	12	40226592	40227297	-	ENSRNOG00000028206	Fam109a
12	38994804	38995143	-	NONRATT007980.2	12	38981926	38995570	-	ENSRNOG00000001336	Orai1
12	38852514	38854389	-	NONRATT007978.2	12	38845620	38869346	-	ENSRNOG00000001337	Setd1b
12	24720900	24722903	-	NONRATT007885.2	12	24722282	24724997	-	ENSRNOG00000018910	Abhd11
12	24091392	24092076	-	NONRATT007873.2	12	24091217	24091580	+	ENSRNOG00000055795	AABR07035832.1
12	23839398	23839816	-	NONRATT007865.2	12	23839398	23841049	-	ENSRNOG00000023546	Hspb1
12	15968176	15969451	-	NONRATT007788.2	12	15890201	15971212	+	ENSRNOG00000001235	Gna12
12	14161997	14163659	-	NONRATT007774.2	12	14169138	14175945	-	ENSRNOG00000001107	Ap5z1
12	12409870	12411750	-	NONRATT007757.2	12	12374741	12403387	+	ENSRNOG00000001010	Tecpr1
12	11122778	11144800	-	NONRATT007739.2	12	11154793	11176106	-	ENSRNOG00000059552	Zkscan5
12	9998759	9999970	-	NONRATT007737.2	12	9997982	9998053	-	ENSRNOG00000059804	SNORD102
12	6711737	6715484	-	NONRATT007713.2	12	6711746	6740714	-	ENSRNOG00000000906	Medag
12	2537288	2538014	-	NONRATT007680.2	12	2517005	2533706	+	ENSRNOG00000001058	Timm44
12	2177277	2180001	-	NONRATT007677.2	12	2158388	2170504	-	ENSRNOG00000000988	Xab2
12	49558789	49561043	+	NONRATT007642.2	12	49565991	49571006	+	ENSRNOG00000047673	Crybb3
12	45905236	45912668	+	NONRATT007595.2	12	45905370	45920013	+	ENSRNOG00000022392	Hspb8
12	43949224	43950053	+	NONRATT007580.2	12	43920563	43940798	-	ENSRNOG00000001123	RGD1562310
12	40619344	40619778	+	NONRATT007552.2	12	40628004	40680374	-	ENSRNOG00000001350	Naa25
12	38879897	38880485	+	NONRATT007516.2	12	38880376	38894582	+	ENSRNOG00000042607	LOC687609
12	38870229	38870898	+	NONRATT007510.2	12	38880376	38894582	+	ENSRNOG00000042607	LOC687609
12	38274347	38286216	+	NONRATT007489.2	12	38274348	38294292	+	ENSRNOG00000001238	Rsrc2
12	37451659	37453370	+	NONRATT007471.2	12	37444071	37465398	+	ENSRNOG00000001039	Eif2b1
12	37018801	37020808	+	NONRATT007465.2	12	36872019	37032904	+	ENSRNOG00000001004	Ncor2
12	30160774	30165923	+	NONRATT007430.2	12	30165693	30178341	+	ENSRNOG00000000903	Asl	Asl
12	29268645	29269748	+	NONRATT007428.2	12	29266601	29268073	+	ENSRNOG00000024435	Wbscr17
12	16899076	16901500	+	NONRATT007318.2	12	16899024	16901934	+	ENSRNOG00000001273	Psmg3
12	8102900	8106380	+	NONRATT007250.2	12	8085524	8108972	+	ENSRNOG00000000924	Slc7a1
12	2170726	2172383	+	NONRATT007215.2	12	2164011	2164278	+	ENSRNOG00000058751	7SK
12	789512	792039	+	NONRATT007205.2	12	703289	791222	+	ENSRNOG00000001098	Pds5b
11	88173645	88185944	-	NONRATT007189.2	11	88173889	88177448	-	ENSRNOG00000001858	Ypel1
11	83921582	83926546	-	NONRATT007148.2	11	83915891	83915966	-	ENSRNOG00000056119	SNORD66
11	81421672	81423274	-	NONRATT007126.2	11	81423150	81444392	-	ENSRNOG00000030387	Kng1l1	Kng1l1
11	67598427	67618155	-	NONRATT007028.2	11	67598418	67618704	-	ENSRNOG00000031653	Ccdc58
11	44217255	44221946	-	NONRATT006938.2	11	44192939	44237100	+	ENSRNOG00000001653	St3gal6
11	43987593	43992576	-	NONRATT006933.2	11	44001578	44003664	+	ENSRNOG00000039680	Gpr15
11	31730190	31751959	-	NONRATT006870.2	11	31719442	31752243	-	ENSRNOG00000002028	Tmem50b
11	31161140	31181453	-	NONRATT006861.2	11	31106933	31180616	-	ENSRNOG00000002051	Synj1
11	14658224	14660926	-	NONRATT006811.2	11	14658224	14741563	-	ENSRNOG00000001585	Nrip1
11	89513249	89514199	+	NONRATT006775.2	11	89511190	89524892	+	ENSRNOG00000001833	Mcm4
11	81372237	81373037	+	NONRATT006697.2	11	81378395	81378464	-	ENSRNOG00000053621	SNORD2
11	77469035	77469763	-	NONRATT006692.2	11	77471557	77593171	-	ENSRNOG00000001928	Il1rap
11	80736444	80736965	-	NONRATT006681.2	11	80736575	80775847	+	ENSRNOG00000001827	Masp1
11	65960245	65960903	+	NONRATT006607.2	11	65960276	65966898	+	ENSRNOG00000002721	LOC688963
11	64733756	64752504	-	NONRATT006603.2	11	64761145	64788208	+	ENSRNOG00000003014	Poglut1
11	36497534	36510183	+	NONRATT006496.2	11	36512973	36533073	-	ENSRNOG00000028248	Lca5l
11	31806635	31812815	+	NONRATT006443.2	11	31780486	31805728	-	ENSRNOG00000028292	Gart
11	30663973	30665044	+	NONRATT006431.2	11	30550140	30663465	+	ENSRNOG00000002092	Hunk
10	109188077	109190096	-	NONRATT006338.2	10	109107449	109187115	+	ENSRNOG00000004049	Baiap2
10	105659804	105668642	-	NONRATT006298.2	10	105650861	105668593	-	ENSRNOG00000012083	St6galnac2
10	94572435	94576500	-	NONRATT006173.2	10	94569889	94576512	-	ENSRNOG00000025143	Icam2
10	90644990	90645567	-	NONRATT006101.2	10	90622991	90642151	+	ENSRNOG00000021953	RGD1563746
10	90250273	90251813	-	NONRATT006078.2	10	90236927	90240509	-	ENSRNOG00000020930	Atxn7l3
10	89998284	90002189	-	NONRATT006069.2	10	90000053	90030423	-	ENSRNOG00000059683	Mpp2
10	88672835	88674497	-	NONRATT006027.2	10	88672842	88677055	-	ENSRNOG00000018906	Ghdc
10	86300154	86301105	-	NONRATT005976.2	10	86303726	86312762	+	ENSRNOG00000028404	Ppp1r1b	Ppp1r1b
10	82047300	82047957	-	NONRATT005891.2	10	82047862	82116621	-	ENSRNOG00000002948	Abcc3
10	74881455	74882801	+	NONRATT005849.2	10	74874137	74878793	+	ENSRNOG00000007367	2020-09-04
10	75032377	75037887	+	NONRATT005842.2	10	75032364	75038547	+	ENSRNOG00000007845	Supt4h1
10	73681501	73682068	-	NONRATT005818.2	10	73634254	73690887	-	ENSRNOG00000003576	Ints2
10	67866931	67869199	-	NONRATT005775.2	10	67810654	67857223	+	ENSRNOG00000005538	Psmd11
10	63776271	63778822	+	NONRATT005712.2	10	63776377	63795688	+	ENSRNOG00000056954	Inpp5k
10	57644193	57644893	-	NONRATT005639.2	10	57644206	57653359	-	ENSRNOG00000055466	Derl2
10	57059767	57070891	-	NONRATT005621.2	10	57060006	57064600	-	ENSRNOG00000026647	Cxcl16
10	56834363	56838779	-	NONRATT005613.2	10	56834363	56839437	-	ENSRNOG00000059956	Bcl6b
10	56578984	56582007	-	NONRATT005603.2	10	56591291	56600232	+	ENSRNOG00000017352	Ctdnep1
10	55559052	55560308	-	NONRATT005561.2	10	55555088	55559082	+	ENSRNOG00000004668	Slc25a35
10	48929033	48930328	-	NONRATT005524.2	10	48903539	48925030	+	ENSRNOG00000003104	Trpv2
10	47526202	47528384	-	NONRATT005501.2	10	47526530	47546345	-	ENSRNOG00000002342	Aldh3a2
10	43760237	43760850	-	NONRATT005459.2	10	43744730	43752158	+	ENSRNOG00000002682	Zfp692
10	40056227	40092635	-	NONRATT005431.2	10	40054399	40122915	-	ENSRNOG00000042449	LOC100362023
10	25903924	25906664	-	NONRATT005361.2	10	25895151	25895322	+	ENSRNOG00000061173	U4
10	25860699	25861923	-	NONRATT005357.2	10	25861489	25890639	-	ENSRNOG00000059894	Hmmr
10	16694903	16697350	-	NONRATT005326.2	10	16677076	16689321	-	ENSRNOG00000020753	Bnip1
10	15160035	15165830	-	NONRATT005287.2	10	15159802	15161938	-	ENSRNOG00000019684	Fam173a
10	7056135	7071555	-	NONRATT005190.2	10	7041509	7055101	+	ENSRNOG00000002610	Carhsp1
10	109665663	109670626	+	NONRATT005145.2	10	109665681	109673143	+	ENSRNOG00000036693	Slc25a10
10	109179904	109183087	+	NONRATT005132.2	10	109107449	109187115	+	ENSRNOG00000004049	Baiap2
10	109073181	109078521	+	NONRATT005127.2	10	109073677	109079348	+	ENSRNOG00000004014	Chmp6
10	105791707	105792596	+	NONRATT005098.2	10	105787934	105792598	+	ENSRNOG00000000249	Mettl23
10	90350207	90351170	+	NONRATT004936.2	10	90351899	90356242	-	ENSRNOG00000020994	Slc25a39
10	90349252	90350144	+	NONRATT004935.2	10	90351899	90356242	-	ENSRNOG00000020994	Slc25a39
10	90134102	90137553	+	NONRATT004929.2	10	90105561	90127600	-	ENSRNOG00000020894	Lsm12
10	89352834	89356562	+	NONRATT004914.2	10	89358375	89366626	+	ENSRNOG00000020678	Ifi35
10	89069453	89070601	+	NONRATT004897.2	10	89076471	89084885	-	ENSRNOG00000020238	Plekhh3
10	87245261	87248711	+	NONRATT004866.2	10	87239919	87248572	-	ENSRNOG00000033617	Krt26
10	82814995	82816736	+	NONRATT004771.2	10	82800703	82816731	+	ENSRNOG00000052113	Ppp1r9b
10	82802252	82814967	+	NONRATT004768.2	10	82800703	82816731	+	ENSRNOG00000052113	Ppp1r9b
10	78111049	78175671	+	NONRATT004745.2	10	78173846	78219793	-	ENSRNOG00000002474	Tom1l1
10	71336123	71357902	+	NONRATT004676.2	10	71332802	71357791	+	ENSRNOG00000053814	Synrg
10	70310273	70312073	+	NONRATT004661.2	10	70298585	70312070	+	ENSRNOG00000021719	Slfn5
10	67457934	67470676	+	NONRATT004637.2	10	67427065	67473649	+	ENSRNOG00000021903	Atad5
10	65175343	65176436	-	NONRATT004622.2	10	65176647	65200109	-	ENSRNOG00000024964	Nufip2
10	62690122	62691951	+	NONRATT004573.2	10	62674560	62690845	+	ENSRNOG00000014742	Ankrd13b
10	59819076	59824202	+	NONRATT004541.2	10	59799122	59824208	+	ENSRNOG00000019486	Trpv1
10	57132534	57132857	+	NONRATT004493.2	10	57131385	57133637	+	ENSRNOG00000019551	Psmb6
10	56524439	56525803	+	NONRATT004460.2	10	56512614	56524229	+	ENSRNOG00000016109	Neurl4
10	54529364	54753303	+	NONRATT004422.2	10	54761870	54967585	-	ENSRNOG00000003947	Ntn1
10	43485401	43487746	+	NONRATT004308.2	10	43446525	43498066	+	ENSRNOG00000031544	Larp1
10	40574555	40576326	+	NONRATT004284.2	10	40543287	40573170	+	ENSRNOG00000012356	Slc36a1
10	36716813	36726735	+	NONRATT004231.2	10	36724025	36724278	+	ENSRNOG00000058789	7SK
10	36715548	36727196	+	NONRATT004228.2	10	36724025	36724278	+	ENSRNOG00000058789	7SK
10	31845645	31846602	+	NONRATT004193.2	10	31813813	31848379	+	ENSRNOG00000007243	Havcr1
10	24040830	24049850	+	NONRATT004170.2	10	23914893	24049832	+	ENSRNOG00000028845	Ebf1
10	852981	859183	+	NONRATT004044.2	10	860520	896938	-	ENSRNOG00000058007	Nde1
10	11281799	11284325	+	NONRATT004023.2	10	11240137	11284332	+	ENSRNOG00000005269	Srl
1	274098119	274106462	-	NONRATT003922.2	1	274097206	274105933	-	ENSRNOG00000014833	Smndc1
1	274070603	274087953	-	NONRATT003917.2	1	274097206	274105933	-	ENSRNOG00000014833	Smndc1
1	267043734	267043996	-	NONRATT003894.2	1	267046360	267245636	-	ENSRNOG00000020353	Sh3pxd2a
1	266829062	266830963	-	NONRATT003888.2	1	266811419	266830976	-	ENSRNOG00000020250	Pcgf6
1	266048832	266051081	-	NONRATT003860.2	1	266053001	266059256	+	ENSRNOG00000019311	Nfkb2
1	264298810	264303479	-	NONRATT003829.2	1	264309213	264319267	+	ENSRNOG00000014234	Hif1an
1	259459440	259463061	-	NONRATT003758.2	1	259376932	259484569	-	ENSRNOG00000015658	Sorbs1
1	255664713	255665682	-	NONRATT003735.2	1	255579473	255654932	+	ENSRNOG00000017938	Btaf1
1	240561951	240562495	-	NONRATT003648.2	1	240562422	240601744	-	ENSRNOG00000017878	Aldh1a7
1	229205986	229206390	-	NONRATT003607.2	1	229206152	229206780	-	ENSRNOG00000050414	AABR07006333.1
1	229020605	229021076	-	NONRATT003603.2	1	229030232	229054373	+	ENSRNOG00000036622	Glyatl1
1	224773076	224822563	-	NONRATT003540.2	1	224824798	224833259	+	ENSRNOG00000018215	Slc22a6
1	222482921	222483634	-	NONRATT003529.2	1	222483600	222485193	-	ENSRNOG00000048337	AC126148.1
1	222480244	222495192	-	NONRATT003528.2	1	222483600	222485193	-	ENSRNOG00000048337	AC126148.1
1	222232350	222233696	-	NONRATT003515.2	1	222242857	222246765	-	ENSRNOG00000043060	Dnajc4
1	221346080	221348944	-	NONRATT003484.2	1	221328710	221343889	-	ENSRNOG00000022673	Slc22a20
1	219385272	219385978	-	NONRATT003411.2	1	219395275	219395623	-	ENSRNOG00000032303	Rpl35a
1	218509477	218512679	-	NONRATT003393.2	1	218508949	218532142	-	ENSRNOG00000013456	Ighmbp2
1	217745074	217746016	-	NONRATT003389.2	1	217746704	217746974	+	ENSRNOG00000061706	AC110851.1
1	216810184	216828574	-	NONRATT003381.2	1	216808669	216828581	-	ENSRNOG00000043486	Tnfrsf26
1	213907669	213909173	-	NONRATT003340.2	1	213886774	213897783	+	ENSRNOG00000015152	Pkp3
1	213750211	213750835	-	NONRATT003337.2	1	213750191	213751405	-	ENSRNOG00000014936	Ifitm2
1	213613510	213614052	-	NONRATT003329.2	1	213613512	213635546	-	ENSRNOG00000013828	Sirt3
1	212324425	212325546	-	NONRATT003319.2	1	212311299	212317244	-	ENSRNOG00000036648	LOC680693
1	212317490	212318079	-	NONRATT003316.2	1	212311299	212317244	-	ENSRNOG00000036648	LOC680693
1	211196226	211205764	-	NONRATT003305.2	1	211205902	211239888	+	ENSRNOG00000016940	Ppp2r2d
1	208001785	208002130	-	NONRATT003293.2	1	207993894	208020454	-	ENSRNOG00000028137	Mki67
1	205951844	205953876	-	NONRATT003284.2	1	205842488	205950371	+	ENSRNOG00000018327	Fank1
1	198829266	198829964	-	NONRATT003210.2	1	198829721	198831691	-	ENSRNOG00000046480	LOC102553962
1	198658744	198659418	-	NONRATT003204.2	1	198641017	198652674	-	ENSRNOG00000017349	Tbc1d10b
1	198574352	198575385	-	NONRATT003199.2	1	198572998	198577226	-	ENSRNOG00000036711	Spn
1	197962453	197963355	-	NONRATT003165.2	1	197964406	197982601	-	ENSRNOG00000018761	Eif3c
1	189186033	189193264	-	NONRATT003100.2	1	189166398	189181901	-	ENSRNOG00000015716	Gp2
1	176940417	176942159	-	NONRATT003063.2	1	176854815	176936884	+	ENSRNOG00000026754	Usp47
1	174949527	174953758	-	NONRATT003056.2	1	174948912	175420106	-	ENSRNOG00000009812	Sbf2
1	167686150	167687958	-	NONRATT003012.2	1	167684804	167685747	+	ENSRNOG00000018537	AC098008.1
1	164922059	164931792	-	NONRATT002972.2	1	164922079	164977633	-	ENSRNOG00000026408	Rnf169
1	163544319	163551251	-	NONRATT002949.2	1	163551195	163554839	-	ENSRNOG00000015560	RGD1310712
X	157319039	157323878	-	NONRATT002900.2	X	157319045	157331204	-	ENSRNOG00000055962	Bgn
X	157236342	157238730	-	NONRATT002898.2	X	157239925	157286936	-	ENSRNOG00000061304	Atp2b3
1	146748695	146812576	-	NONRATT002861.2	1	146766547	146766654	-	ENSRNOG00000061807	U6
1	142712551	142713073	-	NONRATT002824.2	1	142721001	142724511	-	ENSRNOG00000011011	Nmb
1	102749534	102753098	-	NONRATT002685.2	1	102718786	102741581	-	ENSRNOG00000011895	Saal1
1	101449123	101450028	-	NONRATT002642.2	1	101448345	101449829	-	ENSRNOG00000020843	Ftl1
1	100808627	100811904	-	NONRATT002602.2	1	100808240	100810522	-	ENSRNOG00000020060	Atf5
1	88132048	88134478	-	NONRATT002501.2	1	88116811	88123643	-	ENSRNOG00000037580	Psmd8
1	85516128	85516986	-	NONRATT002462.2	1	85516652	85517360	-	ENSRNOG00000019310	Eid2
1	85405752	85408391	-	NONRATT002457.2	1	85407510	85407636	-	ENSRNOG00000055387	SNORA40
1	82337953	82338397	-	NONRATT002408.2	1	82327954	82344345	-	ENSRNOG00000020578	Ceacam1	Ceacam1
1	82112448	82113222	-	NONRATT002400.2	1	82097246	82108203	-	ENSRNOG00000020417	Gsk3a
1	62312796	62314577	-	NONRATT002231.2	1	62314275	62316450	-	ENSRNOG00000061533	Zfp945
1	56661957	56667785	-	NONRATT002193.2	1	56653937	56683731	-	ENSRNOG00000010529	Thbs2
1	37951454	37952034	-	NONRATT002080.2	1	37918571	37957400	-	ENSRNOG00000049259	LOC102549842
1	37811143	37863769	-	NONRATT002073.2	1	37822931	37822996	+	ENSRNOG00000058041	U7
1	24189814	24193567	-	NONRATT002015.2	1	24185455	24191908	-	ENSRNOG00000011815	Sgk1
1	5238108	5238882	-	NONRATT001948.2	1	5240179	5313054	+	ENSRNOG00000014450	Shprh
1	2339118	2339841	-	NONRATT001931.2	1	2333777	2627747	-	ENSRNOG00000016381	Ust
1	2000374	2001227	-	NONRATT001930.2	1	1999595	2073896	-	ENSRNOG00000016054	Tab2
1	267507055	267508803	+	NONRATT001847.2	1	267511522	267598639	-	ENSRNOG00000036585	Cfap43
1	267505429	267508831	+	NONRATT001846.2	1	267511522	267598639	-	ENSRNOG00000036585	Cfap43
1	267396826	267415761	+	NONRATT001841.2	1	267417458	267463694	-	ENSRNOG00000012110	Col17a1
1	263520568	263526296	+	NONRATT001757.2	1	263494851	263511505	-	ENSRNOG00000017230	LOC100911779
1	258002993	258004282	+	NONRATT001713.2	1	257970344	258004434	+	ENSRNOG00000052810	Cyp2c11	Cyp2c11
1	251488139	251490990	+	NONRATT001683.2	1	251421595	251487832	+	ENSRNOG00000020723	Pten
1	244742291	244743000	+	NONRATT001639.2	1	244615820	244781633	+	ENSRNOG00000011931	Smarca2
1	238855065	238856391	+	NONRATT001599.2	1	238843337	238852566	+	ENSRNOG00000018107	Zfand5
1	57382301	57390349	+	NONRATT001590.2	1	57345576	57390470	+	ENSRNOG00000058790	Fam120b
1	225208018	225208627	+	NONRATT001524.2	1	225195801	225214010	+	ENSRNOG00000057569	Ahnak
1	225202500	225202736	+	NONRATT001520.2	1	225195801	225214010	+	ENSRNOG00000057569	Ahnak
1	224450463	224451041	+	NONRATT001495.2	1	224457899	224533219	-	ENSRNOG00000061890	Ust5r
1	220892491	220893563	+	NONRATT001442.2	1	220882183	220883062	-	ENSRNOG00000055506	1700020D05Rik
1	220891628	220892374	+	NONRATT001441.2	1	220882183	220883062	-	ENSRNOG00000055506	1700020D05Rik
1	214182817	214186682	+	NONRATT001343.2	1	214196429	214202853	-	ENSRNOG00000017050	Lmntd2
1	201950179	201965457	+	NONRATT001272.2	1	201950143	201965488	+	ENSRNOG00000020605	Pstk
1	198983567	198984499	+	NONRATT001228.2	1	198895284	199061107	-	ENSRNOG00000018877	Zfp629
1	198842332	198843033	+	NONRATT001222.2	1	198834988	198839228	-	ENSRNOG00000031003	LOC102553866
1	190672621	190674851	+	NONRATT001152.2	1	190666148	190671228	+	ENSRNOG00000061899	BC030336
1	185538648	185539623	+	NONRATT001131.2	1	185356974	185538694	+	ENSRNOG00000024602	Plekha7
1	177765720	177766465	+	NONRATT001118.2	1	177764444	177765968	+	ENSRNOG00000014847	Rassf10	Rassf10
1	174778832	174779246	+	NONRATT001090.2	1	174767959	174786361	+	ENSRNOG00000010017	Wee1
1	174330932	174338548	+	NONRATT001083.2	1	174338883	174350196	-	ENSRNOG00000013713	LOC499240
1	167089887	167090679	+	NONRATT001051.2	1	167066515	167090296	+	ENSRNOG00000000417	Numa1
1	166865954	166883688	+	NONRATT001041.2	1	166886614	166886711	-	ENSRNOG00000044463	5S_rRNA
1	164102026	164110288	+	NONRATT000986.2	1	164114209	164142206	-	ENSRNOG00000016573	Dgat2
1	142079565	142080883	+	NONRATT000852.2	1	142060954	142083953	+	ENSRNOG00000013149	Vps33b
1	126885981	126886826	+	NONRATT000778.2	1	126749507	126947392	+	ENSRNOG00000011526	Pcsk6
1	126586551	126588395	+	NONRATT000776.2	1	126586542	126595603	+	ENSRNOG00000011290	Tm2d3
1	101688780	101690849	+	NONRATT000710.2	1	101688296	101692804	+	ENSRNOG00000021027	Dbp	Dbp
1	101688324	101689835	+	NONRATT000709.2	1	101688296	101692804	+	ENSRNOG00000021027	Dbp	Dbp
1	100950450	100953942	+	NONRATT000681.2	1	100955094	100969560	-	ENSRNOG00000026163	Cpt1c
1	99528860	99537598	+	NONRATT000641.2	1	99532567	99538947	+	ENSRNOG00000030160	Zfp819
1	98399626	98403390	+	NONRATT000632.2	1	98398659	98402968	+	ENSRNOG00000037331	Cd33
1	91655771	91657044	+	NONRATT000606.2	1	91657262	91663467	-	ENSRNOG00000022393	RGD1564719
1	91365197	91366164	+	NONRATT000603.2	1	91363491	91366164	+	ENSRNOG00000010918	Cebpa
1	85397299	85399748	+	NONRATT000537.2	1	85407510	85407636	-	ENSRNOG00000055387	SNORA40
1	79898550	79909333	+	NONRATT000414.2	1	79899154	79911513	+	ENSRNOG00000014132	Mypop
1	78021604	78023371	+	NONRATT000377.2	1	78029554	78054044	+	ENSRNOG00000001492	Slc8a2
1	61788569	61789370	+	NONRATT000286.2	1	61786899	61818159	+	ENSRNOG00000057250	AABR07001905.1
1	47130675	47131556	+	NONRATT000173.2	1	47032112	47127035	+	ENSRNOG00000018012	Tulp4
1	47129769	47130620	+	NONRATT000172.2	1	47032112	47127035	+	ENSRNOG00000018012	Tulp4
1	15799747	15810401	+	NONRATT000050.2	1	15799852	15826636	+	ENSRNOG00000058050	Bclaf1
1	12959319	12961680	+	NONRATT000035.2	1	12952552	12952906	-	ENSRNOG00000060610	AABR07071848.1
1	1720386	1720772	+	NONRATT000005.2	1	1702695	1731210	+	ENSRNOG00000014303	Lrp11
1	1702208	1702943	+	NONRATT000004.2	1	1702695	1731210	+	ENSRNOG00000014303	Lrp11
18	6455564	6459444	-	MSTRG.9923.2	18	6374777	6474990	-	ENSRNOG00000016467	Kctd1
17	43484687	43486319	-	MSTRG.9484.1	17	43477599	43504604	-	ENSRNOG00000042692	Slc17a1
16	56827045	56827398	-	MSTRG.8858.2	16	56813790	56900052	-	ENSRNOG00000012779	Msr1
1	11971450	11971922	+	MSTRG.88.2	1	11963835	11968939	+	ENSRNOG00000047746	LOC100909555
14	114783332	114786704	+	MSTRG.7640.1	14	114778046	114778153	-	ENSRNOG00000057932	U6
14	114749976	114783188	+	MSTRG.7636.1	14	114778046	114778153	-	ENSRNOG00000057932	U6
12	9285850	9294306	-	MSTRG.5414.4	12	9216535	9331195	-	ENSRNOG00000000942	Pan3
12	9285845	9294298	-	MSTRG.5414.3	12	9216535	9331195	-	ENSRNOG00000000942	Pan3
11	77644890	77650719	-	MSTRG.5121.1	11	77644540	77668754	+	ENSRNOG00000048672	Tmem207
11	57265789	57277305	+	MSTRG.4913.6	11	57207678	57260568	+	ENSRNOG00000042289	Plcxd2
1	260747354	260763495	+	MSTRG.2665.2	1	260732484	260807926	+	ENSRNOG00000042679	Lcor
1	251183774	251189557	-	MSTRG.2582.1	1	251145252	251229303	+	ENSRNOG00000011068	Papss2
1	229055818	229068290	-	MSTRG.2420.1	1	229066044	229080410	+	ENSRNOG00000012142	Glyat
KL568257.1	11854	13130	+	MSTRG.23054.2	KL568257.1	10000	3614	-	ENSRNOG00000057079	AABR07022813.1
9	113523885	113526916	+	MSTRG.22910.3	9	113534325	113573307	+	ENSRNOG00000013733	Ppp4r1
9	4074595	4077636	+	MSTRG.22046.4	9	4072822	4113212	+	ENSRNOG00000047369	LOC100910057
8	84511120	84512100	-	MSTRG.21471.1	8	84434783	84522588	-	ENSRNOG00000005934	Mlip
8	68671135	68677378	-	MSTRG.21290.3	8	68569529	68678349	-	ENSRNOG00000008620	Smad3
8	64310751	64327301	-	MSTRG.21232.1	8	64299645	64305330	-	ENSRNOG00000026112	Tmem202
5	163118446	163121423	+	MSTRG.17916.1	5	162893827	163119208	-	ENSRNOG00000016443	Vps13d
5	140391194	140397004	+	MSTRG.17489.5	5	140275501	140480314	-	ENSRNOG00000059975	AC124205.2
5	140391194	140397004	+	MSTRG.17489.4	5	140275501	140480314	-	ENSRNOG00000059975	AC124205.2
5	140391194	140397004	+	MSTRG.17489.3	5	140275501	140480314	-	ENSRNOG00000059975	AC124205.2
4	140077327	140134632	-	MSTRG.16090.1	4	140092351	140105316	+	ENSRNOG00000006806	Setmar
3	139951502	139964671	-	MSTRG.14660.1	3	139944651	139945569	-	ENSRNOG00000026836	Rn60_3_1464.1
20	20121040	20125060	+	MSTRG.13241.2	20	20105046	20471259	+	ENSRNOG00000053288	Ank3
20	20626631	20630707	-	MSTRG.13228.1	20	20640684	20680675	-	ENSRNOG00000000633	Rhobtb1
20	331995	334295	-	MSTRG.12799.3	20	321808	323703	-	ENSRNOG00000053746	Olr1668	Olr1668
20	330088	334272	-	MSTRG.12799.1	20	321808	323703	-	ENSRNOG00000053746	Olr1668	Olr1668
2	98272318	98276120	+	MSTRG.11664.1	2	98252924	98269184	+	ENSRNOG00000008748	Pex2
2	78174393	78184906	+	MSTRG.11575.7	2	78170223	78170524	+	ENSRNOG00000048993	Metazoa_SRP	Metazoa_SRP
2	68896417	68897809	+	MSTRG.11562.3	2	68820614	68892944	+	ENSRNOG00000053979	Egf
2	45720104	45726588	+	MSTRG.11449.2	2	45668968	46050564	+	ENSRNOG00000011105	Arl15
2	45690972	45709141	+	MSTRG.11448.4	2	45668968	46050564	+	ENSRNOG00000011105	Arl15
2	45690972	45749139	+	MSTRG.11448.2	2	45668968	46050564	+	ENSRNOG00000011105	Arl15
18	53907657	53909152	+	MSTRG.10244.2	18	53905346	53905847	+	ENSRNOG00000043100	Rn60_18_0532.1
1	226794182	226812454	+	ENSRNOT00000091800	1	226770743	226791879	-	ENSRNOG00000020872	Cd5
4	118328837	118334020	+	ENSRNOT00000090348	4	118327532	118328602	-	ENSRNOG00000017708	AABR07073038.1
20	3403203	3403731	-	ENSRNOT00000090050	20	3372412	3397039	-	ENSRNOG00000000816	Ppp1r18
13	74762893	74766473	+	ENSRNOT00000089910	13	74771521	74923402	-	ENSRNOG00000004917	Rasal2
19	52051266	52061809	-	ENSRNOT00000089288	19	52032885	52048753	+	ENSRNOG00000014522	Mlycd
5	133889759	133895461	-	ENSRNOT00000088365	5	133896140	133900726	+	ENSRNOG00000008161	Pdzk1ip1
4	157753690	157755858	+	ENSRNOT00000088061	4	157744881	157750088	-	ENSRNOG00000027466	Cd27	Cd27
5	126222096	126223761	+	ENSRNOT00000083620	5	126226290	126244538	+	ENSRNOG00000007189	Ttc22
14	86100049	86101181	+	ENSRNOT00000083054	14	86101276	86111306	+	ENSRNOG00000013720	Aebp1
20	56198048	56199332	+	ENSRNOT00000082897	20	56192389	56197025	-	ENSRNOG00000050735	Cd99
9	71388274	71398583	-	ENSRNOT00000081933	9	71398709	71434493	+	ENSRNOG00000023807	Ccnyl1
12	17720599	17729778	+	ENSRNOT00000080542	12	17735739	17755285	+	ENSRNOG00000001312	Pdgfa
X	73556844	73557268	+	ENSRNOT00000077029	X	73557541	73562046	-	ENSRNOG00000061703	Gm14597
13	75158208	75167669	+	ENSRNOT00000076067	13	75175253	75216941	+	ENSRNOG00000005229	Sec16b
LncRNA, long non-coding RNA.
